# Working strokes produced by curling protofilaments at disassembling microtubule tips can be biochemically tuned and vary with species

## Authors and Affiliations:

Murray, Lucas E.<sup>1</sup>; Kim, Haein<sup>1</sup>; Rice, Luke M.<sup>2,3</sup>; Asbury, Charles L.<sup>1,4</sup>

<sup>1</sup>Department of Physiology and Biophysics, University of Washington, Seattle, USA;

<sup>2</sup>Department of Biophysics, UT Southwestern Medical Center, Dallas, USA; <sup>3</sup>Department of

Biochemistry, UT Southwestern Medical Center, Dallas, USA, <sup>4</sup>Department of Biochemistry,

University of Washington, Seattle, USA

**Abstract:** The disassembly of microtubules can generate force and drive intracellular motility. During mitosis, chromosomes remain persistently attached via kinetochores to the tips of disassembling microtubules, which pull the sister chromatids apart. According to the conformational wave hypothesis, such force generation requires that protofilaments curl outward from the disassembling tips to exert pulling force directly on kinetochores. Rigorously testing this idea will require modifying the mechanical and energetic properties of curling protofilaments, but no way to do so has yet been described. Here, by direct measurement of working strokes generated in vitro by curling protofilaments, we show that their mechanical energy output can be increased by adding magnesium, and that yeast microtubules generate larger and more energetic working strokes than bovine microtubules. Both the magnesium and species-dependent increases in work output can be explained by a lengthening of protofilament curls, without any change in their bending stiffness or intrinsic curvature. These observations demonstrate how work output from curling protofilaments can be tuned and suggest evolutionary conservation of the amount of curvature strain energy stored in the microtubule lattice.

## Introduction:

Microtubules are filamentous polymers central to the active transport of cargoes in cells. While they often serve as passive tracks along which dynein and kinesin motors move, these filaments can also drive motility directly. Dynamic microtubules in the mitotic spindle transport chromosomes during cell division by shortening while their disassembling tips remain coupled via kinetochores to the chromosomes (Desai & Mitchison, 1997; Inoue & Salmon, 1995; McIntosh, Volkov, Ataullakhanov, & Grishchuk, 2010). Dynamic microtubules also generate force to properly position the mitotic spindle and the nucleus within cells (Carminati & Stearns, 1997; Dogterom, Kerssemakers, Romet-Lemonne, & Janson, 2005; Kozlowski, Srayko, & Nedelec, 2007; McIntosh et al., 2010; Nguyen-Ngoc, Afshar, & Gonczy, 2007). These microtubule-driven movements are powered by GTP hydrolysis. GTP is incorporated into the assembling polymer tip and then hydrolyzed, depositing energy into the GDP-tubulin lattice. The stored lattice energy is released during disassembly and can be harnessed to generate pulling force. Thus microtubules, like dynein and kinesin motors, convert chemical energy into mechanical work (McIntosh et al., 2010). How they do so remains poorly understood.

41 Two distinct classes of mechanism could explain how disassembling microtubule tips  
42 generate pulling force: the biased diffusion and conformational wave mechanisms.  
43 According to biased diffusion-based models, a tip-coupler such as the kinetochore  
44 undergoes a thermally driven random walk along the microtubule surface that is biased at  
45 the tip, due to the affinity of the coupler for the microtubule. If the affinity of the coupler  
46 for the microtubule is sufficiently high and if its diffusion is sufficiently fast, then the coupler  
47 can remain persistently associated with the disassembling tip, where it will experience a  
48 thermodynamic force in the direction of disassembly (Hill, 1985). The effect is analogous to  
49 capillary action that pulls fluids into narrow channels. Biased diffusion of a key kinetochore  
50 element, the Ndc80 complex, has been observed directly on microtubules in vitro (Powers  
51 et al., 2009).

52 By contrast, force generation in conformational wave-based models depends on structural  
53 changes at disassembling microtubule tips. During disassembly, individual rows of tubulin  
54 dimers called protofilaments curl outward from the tip before breaking apart, creating a  
55 wave of conformational change that propagates down the long axis of the microtubule  
56 (Kirschner, Williams, Weingarten, & Gerhart, 1974; Mandelkow & Mandelkow, 1985). These  
57 curling protofilaments are proposed to physically hook the kinetochore and pull against it  
58 to drive motility (Koshland, Mitchison, & Kirschner, 1988). Prior work showed that the  
59 amount of mechanical strain energy released by curling protofilaments is more than  
60 sufficient to account for kinetochore motility (Driver, Geyer, Bailey, Rice, & Asbury, 2017).  
61 However, whether kinetochores specifically harness any of this strain energy remains  
62 unclear, owing in part to the lack of methods for modifying mechanical or energetic  
63 properties of protofilament curls.

64 Many prior studies have established that added magnesium profoundly affects the dynamics  
65 of microtubules in vitro, altering the rates of switching between tip growth and shortening  
66 (O'Brien, Salmon, Walker, & Erickson, 1990), accelerating tip disassembly (Martin, Butler,  
67 Clark, Zhou, & Bayley, 1987), and lengthening the protofilament curls at disassembling tips  
68 (Mandelkow, Mandelkow, & Milligan, 1991). Binding of magnesium to acidic residues in the  
69 disordered C-terminal tail of tubulin is implicated in magnesium-dependent acceleration of  
70 disassembly (Fees & Moore, 2018; Sackett, Bhattacharyya, & Wolff, 1985; Serrano, Avila, &  
71 Maccioni, 1984; Weisenberg, 1972). Faster disassembly by itself might explain why  
72 magnesium also lengthens protofilament curls, because it implies a faster rate of curling  
73 (i.e., that GDP-tubulins are losing their lateral bonds and curling outward more quickly)  
74 (Tran, Joshi, & Salmon, 1997). However, magnesium might also stabilize the longitudinal  
75 bonds within protofilament curls, thereby reducing the rate at which the curls break. To  
76 disentangle magnesium's effects on curling and breakage rates, a systematic examination  
77 of curl contour length as a function of disassembly speed is required.

78 Previously we developed an assay for measuring forces and displacements generated by  
79 curling protofilaments (Driver et al., 2017) based on earlier pioneering work (Grishchuk,  
80 Molodtsov, Ataullakhanov, & McIntosh, 2005). In our "wave" assay, the curling  
81 protofilaments push laterally against a microbead tethered to the microtubule wall, thereby  
82 generating a brief pulse of bead motion against the force of a feedback-controlled laser trap.  
83 We show here that the sizes of these pulses – and the mechanical work energy that can be  
84 harnessed from them – are substantially increased by the addition of millimolar levels of

85 magnesium. By measuring wave pulses after proteolytic cleavage of the  $\beta$ -tubulin C-terminal  
86 tail, we show that magnesium enlarges the pulses independently of its acceleration of  
87 disassembly, indicating that magnesium directly stabilizes the longitudinal bonds within  
88 protofilament curls. We also demonstrate that pulses generated by yeast tubulin are larger  
89 than those generated by bovine brain tubulin. A simple mechanical model shows that both  
90 the magnesium- and species-dependent changes in pulse energy can be explained solely by  
91 increasing the contour lengths of protofilament curls, without changing their intrinsic  
92 flexural rigidity or curvature. The conservation of protofilament flexural rigidity and stored  
93 lattice strain suggest that these biophysical properties are crucial to microtubule function in  
94 cells.

## 95 **Results:**

### 96 *Measuring outward curling of protofilaments from bovine brain* 97 *microtubules*

98 We previously measured the mechanical and energetic properties of protofilaments as they  
99 curled outward from recombinant yeast-tubulin microtubules (Driver et al., 2017). In our  
100 wave assay, a laser trap applies force against the curling protofilaments, via beads tethered  
101 to the microtubule lattice through a His<sub>6</sub> tag on the C-terminus of  $\beta$ -tubulin (Johnson, Ayaz,  
102 Huddleston, & Rice, 2011). Linkage through the  $\beta$ -tubulin C-terminal tail creates a strong,  
103 flexible tether approximately 36 nm in length, which probably helps to avoid interference  
104 between the tethered bead and the curling protofilaments (Driver et al., 2017). To extend  
105 our approach to untagged mammalian brain tubulin, we modified the assay by introducing  
106 anti-His beads pre-decorated sparsely with the recombinant His<sub>6</sub>-tagged yeast tubulin into  
107 chambers containing coverslip-anchored microtubules growing from free bovine brain  
108 tubulin. The bead-linked yeast tubulin was incorporated into the assembling bovine  
109 microtubules, resulting in beads tethered to the sides of the filaments (Murray, Kim, Rice, &  
110 Asbury, 2022) (Figure 1a). Continuous tension, directed toward the plus end, was applied to  
111 a microtubule-tethered bead using feedback control. The tension pressed the bead against  
112 the microtubule lattice at a secondary contact point and suppressed Brownian motion,  
113 which facilitated tracking the bead with high spatiotemporal resolution. The microtubule  
114 plus end was then severed with laser scissors to induce disassembly (Franck, Powers,  
115 Gestaut, Davis, & Asbury, 2010). As the disassembling tip passed the secondary contact  
116 point, protofilament curls pushed laterally on the bead, causing it to rotate about its tether.  
117 This rotation produced a brief (100 – 400 ms) pulse of bead movement against the force of  
118 the laser trap, which was followed by bead detachment after further disassembly released  
119 the tether (Figure 1b). The pulses were parameterized by their amplitude relative to the  
120 baseline bead position (Figure 1–figure supplement 1), which is directly related to the lateral  
121 height that the protofilament curls project from the surface of the microtubule lattice  
122 (Figure 1–figure supplement 2) (Driver et al., 2017).

123 At 2 pN of trapping force, 59% of disassembly events yielded measurable pulses, with a  
124 mean amplitude of 18 nm. At higher forces, pulse amplitudes became smaller (Figure 1b),  
125 consistent with spring-like elasticity of the curling protofilaments, as we previously observed  
126 for yeast tubulin protofilament curls (Driver et al., 2017). Pulse amplitudes generated by  
127 bovine microtubules were smaller than those we measured previously from yeast

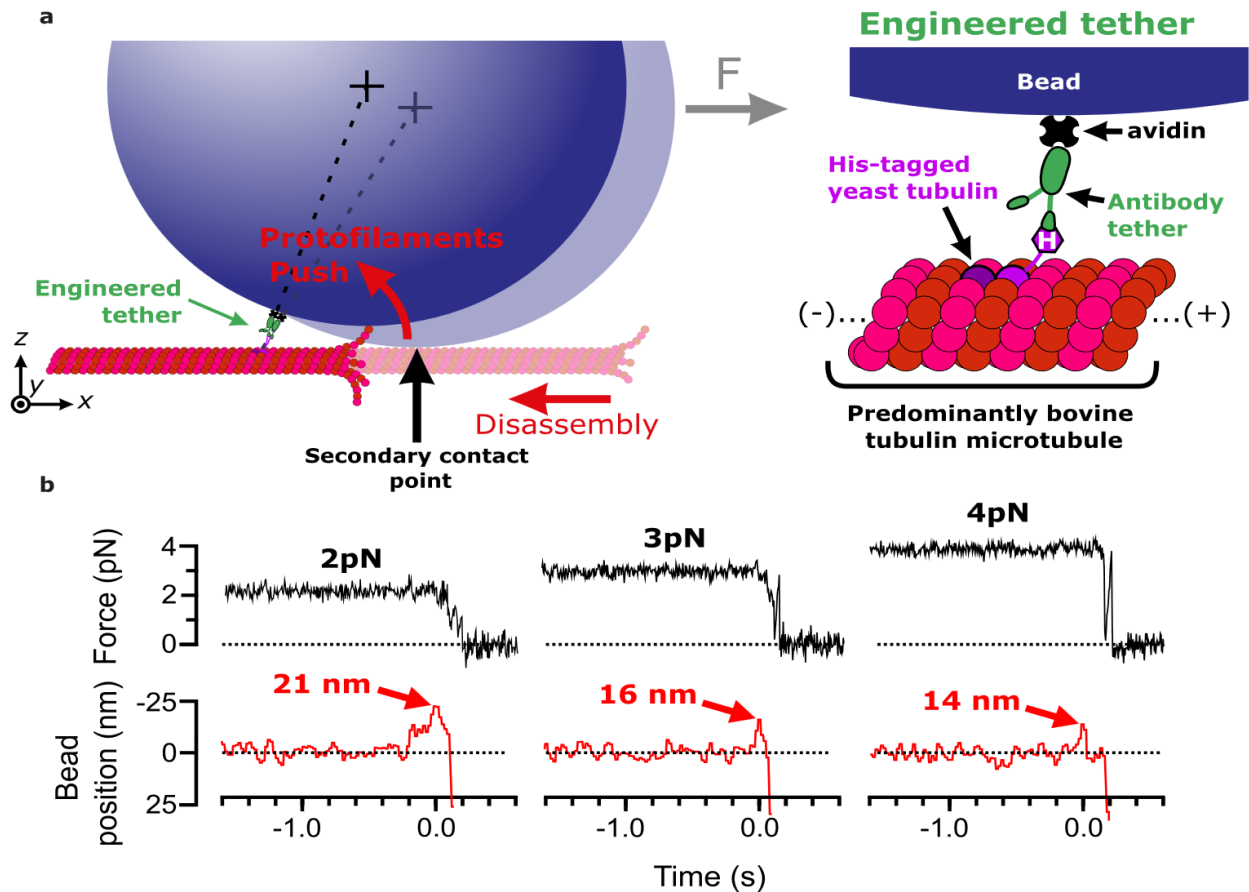

**Figure 1. Measuring pulses of movement generated by protofilaments curling outward from the tips of disassembling bovine microtubules.** (a) Schematic of the wave assay: A bead is tethered to the microtubule lattice via an engineered tether composed of recombinant His<sub>6</sub>-tagged yeast tubulin, a biotinylated anti-penta-His antibody, and streptavidin. Using a laser trap, the bead is tensioned towards the (+)-end, pressing it against the microtubule lattice at a secondary contact point. The stabilizing GTP cap is trimmed off the microtubule with laser scissors to initiate disassembly. Curling protofilaments at the disassembling microtubule tip form a conformational wave that pushes laterally on the bead, causing it to rock back about its tether. This rocking action produces a pulse of bead movement against the force of the laser trap. (b) Records of force (black) and bead position (red) versus time for three different bead-microtubule pairs. As the trapping force on the bead was increased, pulse heights decreased, consistent with spring-like behavior of the protofilament curls.

The following figure supplements are available for figure 1:

**Figure 1–figure supplement 1. Features of the pulses of bead motion generated by curling protofilaments.**

**Figure 1–figure supplement 2. The bead and tether form a leverage system that amplifies protofilament curling motion.**

128  
129  
130  
131  
132  
133

microtubules at identical force levels (e.g., 19 versus 45 nm on average at 2 pN) (Driver et al., 2017). This observation suggests that bovine protofilament curls might be shorter than yeast curls, consistent with reports that disassembly products released from mammalian brain microtubules are shorter than their yeast-derived counterparts (Howes et al., 2018). Nevertheless, our findings confirm that pulses from bovine microtubules can be reliably measured using our modified wave assay.

134  
135

## Adding magnesium enlarges the pulses generated by curling protofilaments

136  
137  
138  
139  
140  
141  
142  
143  
144  
145

Divalent cations have long been known to affect tubulin self-association (Nogales et al., 1995; Olmsted & Borisy, 1975; Weisenberg, 1972), and to influence microtubule dynamics (Rosenfeld, Zackroff, & Weisenberg, 1976; Weisenberg, 1972). These effects are achieved partly through interactions of magnesium ions with the unstructured C-terminal tails of tubulin (Fees & Moore, 2018; Serrano, Delatorre, Maccioni, & Avila, 1984) and with the exchangeable and non-exchangeable nucleotide binding sites (Lee & Timasheff, 1975). Early cryo-electron microscopy of disassembling microtubules showed that magnesium lengthens protofilament curls at disassembling tips (Mandelkow et al., 1991). Based on these prior observations, we predicted that pulses recorded in our wave assay might become larger and more energetic with added magnesium.

146  
147

As previously observed (Fees & Moore, 2018), we found that adding magnesium accelerated the disassembly of bovine brain tubulin microtubules, increasing their shortening speeds by

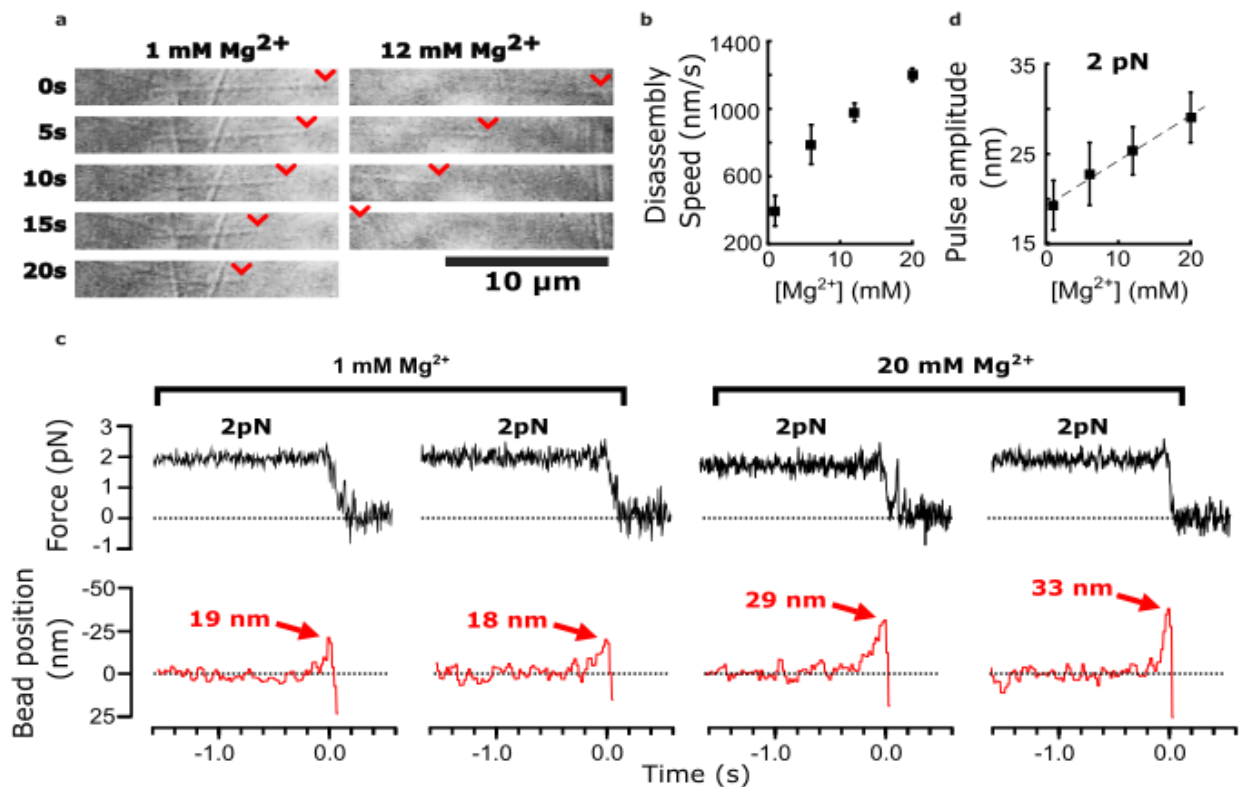

**Figure 2. Added magnesium increases disassembly speed and pulse amplitude.** (a) Time-lapse differential interference contrast images of individual microtubules disassembling in the presence of 1 or 12 mM magnesium. Arrowheads (red) indicate locations of disassembling tips. (b) Mean disassembly speed plotted against magnesium concentration. Error bars represent 95% confidence intervals, defined as  $\pm (t\text{-SEM})$ , where  $t$  is drawn from Student's  $t$ -distribution (with  $\nu = N - 1$  degrees of freedom and  $N = 34 - 51$  samples per mean). (c) Records of force (black) and bead position (red) versus time for four bead-microtubule pairs, at two different magnesium concentrations. Pulse amplitudes were larger at the higher magnesium level. (d) Mean pulse amplitudes across four different magnesium concentrations, 1, 6, 12 and 20 mM. Error bars represent 95% confidence intervals (defined as in (b), with  $\nu = N - 1$  degrees of freedom and  $N = 25 - 40$  samples per mean). Data in (c) and (d) were collected at 2 pN trap force.

148  
149  
150  
151  
152  
153  
154  
155  
156  
157  
158  
159  
160

about three-fold, from  $430 \text{ nm}\cdot\text{s}^{-1}$  at our initial level of  $1 \text{ mM}$  magnesium to  $1,200 \text{ nm}\cdot\text{s}^{-1}$  at  $20 \text{ mM}$  magnesium (Figure 2a and 2b). Consistent with our prediction, adding magnesium also increased the amplitudes of pulses measured in the wave assay (Figure 2c). At  $2 \text{ pN}$  of trapping force, the mean amplitude increased by 60% from  $19 \text{ nm}$  at  $1 \text{ mM}$  magnesium up to  $29 \text{ nm}$  at  $20 \text{ mM}$  magnesium (Figure 2d). This magnesium-dependent increase in pulse amplitude might be explained simply by a lengthening of the protofilament curls, as suggested by early cryo-electron microscopy studies. However, it might also reflect increases in the mechanical stiffness or curvature of the protofilaments, or in the number of protofilaments that push against the bead in the wave assay (as discussed below).

### *Adding magnesium increases work output from protofilament curls*

To determine whether adding magnesium affects the mechanochemical work output from curling protofilaments, we measured pulse amplitudes across a variety of trapping forces and magnesium concentrations (Figure 3; and Figure 3-figure supplement 1). Measuring

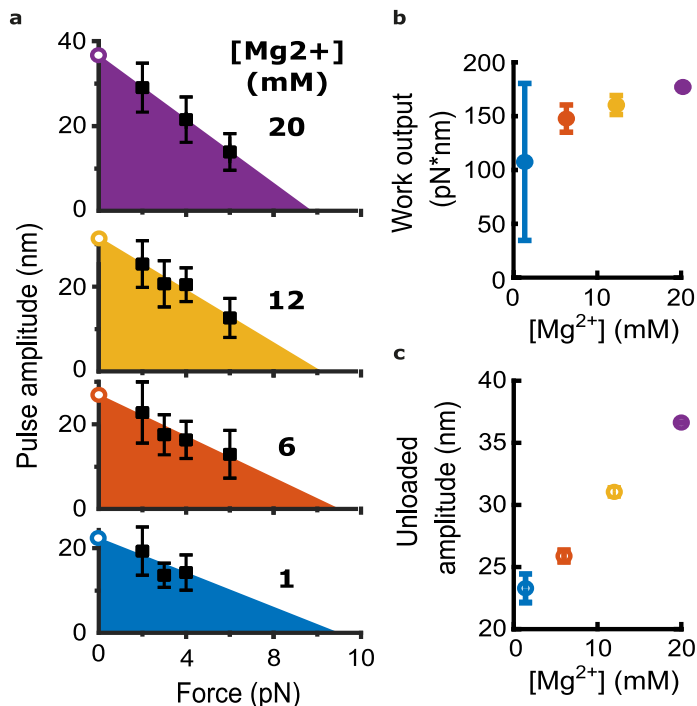

**Figure 3. Magnesium increases the mechanical work output harnessed from curling protofilaments.** (a) Mean pulse amplitudes (black squares) plotted against trapping force at the four indicated magnesium concentrations. Error bars represent 95% confidence intervals, defined as  $\pm (t\text{-SEM})$ , where  $t$  is drawn from Student's  $t$ -distribution (with  $\nu = N - 1$  degrees of freedom and  $N = 9 - 43$  samples per mean). The capacity of protofilament curls to perform mechanical work in the assay was estimated at each magnesium concentration by fitting the amplitude versus force data with a line and then calculating the area under the line (colored triangular areas). To estimate unloaded pulse amplitudes, the line-fits were extrapolated to the y-intercept (open circles). (b) Mechanical work output, based on the colored areas shown in (a), plotted against magnesium concentration. Error bars represent 95% confidence intervals (estimated from the best-fit parameters, as explained in Materials & Methods). (c) Unloaded amplitudes, based on extrapolation of the line-fits in (a), plotted versus magnesium concentration. Error bars represent 95% confidence intervals (estimated as explained in Materials & Methods).

The following figure supplement is available for figure 3:

**Figure 3-figure supplement 1. Cumulative distributions of pulse amplitude measured with bovine tubulin at different trapping forces and magnesium levels.**

161 pulse amplitude as a function of force enables estimation of the total capacity for  
162 mechanical work output in the assay, which is given by the area under the amplitude-vs-  
163 force curve (Figure 3a) (Driver et al., 2017). Based on a line fit to the data, we estimated  
164 work output from the bovine brain microtubules in 1 mM magnesium at 105 pN·nm (Figure  
165 3b). Adding magnesium increased the work output monotonically, raising it to 175 pN·nm  
166 at 20 mM magnesium (Figure 3b). This magnesium-induced increase was mainly due to  
167 enlargement of the pulses measured at low trapping force; extrapolating the line fits to zero  
168 force suggested that the unloaded pulse amplitude (i.e., the amplitude that would be  
169 measured in the absence of opposing trap force) increased 57% from 23 nm at 1 mM  
170 magnesium to 36 nm at 20 mM magnesium (Figure 3c). By contrast, extrapolating the linear  
171 fits to higher forces suggested relatively little change in maximum force at which the pulses  
172 were completely suppressed (~9 pN) (Figure 3a). Altogether, these observations show that  
173 magnesium increases mechanical work output from curling protofilaments while also  
174 increasing the lateral height that they project from the microtubule wall.

175 Notably, the mechanical work output from bovine microtubules was about three-fold less  
176 than we measured previously from microtubules composed entirely of recombinant yeast  
177 tubulin under similar conditions (~300 pN·nm at 1 mM magnesium) (Driver et al., 2017). This  
178 difference, like magnesium-dependent differences, could reflect altered contour lengths,  
179 bending stiffnesses, average curvatures, numbers of curling protofilaments pushing on the  
180 beads, or a combination thereof.

### 181 *Curl elongation alone can explain the magnesium-dependent increase in* 182 *work output*

183 To develop a deeper understanding of how magnesium increases the mechanical work  
184 output from curling protofilaments, we created a simple model of protofilament bending.  
185 The model relates structural aspects of protofilament curls, such as their relaxed curvature  
186 and the average number of dimers they contain, together with an estimate of their flexural  
187 rigidity, to predict the force-deflection behavior of a group of curls projecting radially  
188 outward from a microtubule tip. For simplicity, each individual tubulin dimer within a  
189 protofilament curl was modeled as a rigid rod connected to its longitudinal neighbors by  
190 Hookean bending springs (Figure 4a). These bending springs represented, in an idealized  
191 manner, all the contributions to elastic strain energy stored within a protofilament, including  
192 strain energy at the inter- and intra-dimer interfaces, and internal strain within the  $\alpha$ - and  
193  $\beta$ -tubulin core structures. Contour shapes for the individual protofilaments were solved by  
194 balancing the external force applied at their tip with the opposing bending spring torque at  
195 each inter-dimer node (Figure 4b, left). To model the force-deflection behavior of a group  
196 of protofilaments, single protofilaments were arranged radially, according to a 13-  
197 protofilament geometry (Figure 4b, right) (Amos & Klug, 1974). The bead was modeled as a  
198 rigid, flat surface since its curvature is negligible compared to that of the microtubule tip.  
199 Prior cryo-electron tomography studies of disassembling microtubules found almost all the  
200 variation in protofilament shape to occur in the radial direction (i.e., within a plane  
201 coincident with both the relaxed contour and the long axis of the microtubule) (McIntosh et  
202 al., 2018). Therefore, protofilament bending in our model was limited to the radial direction.

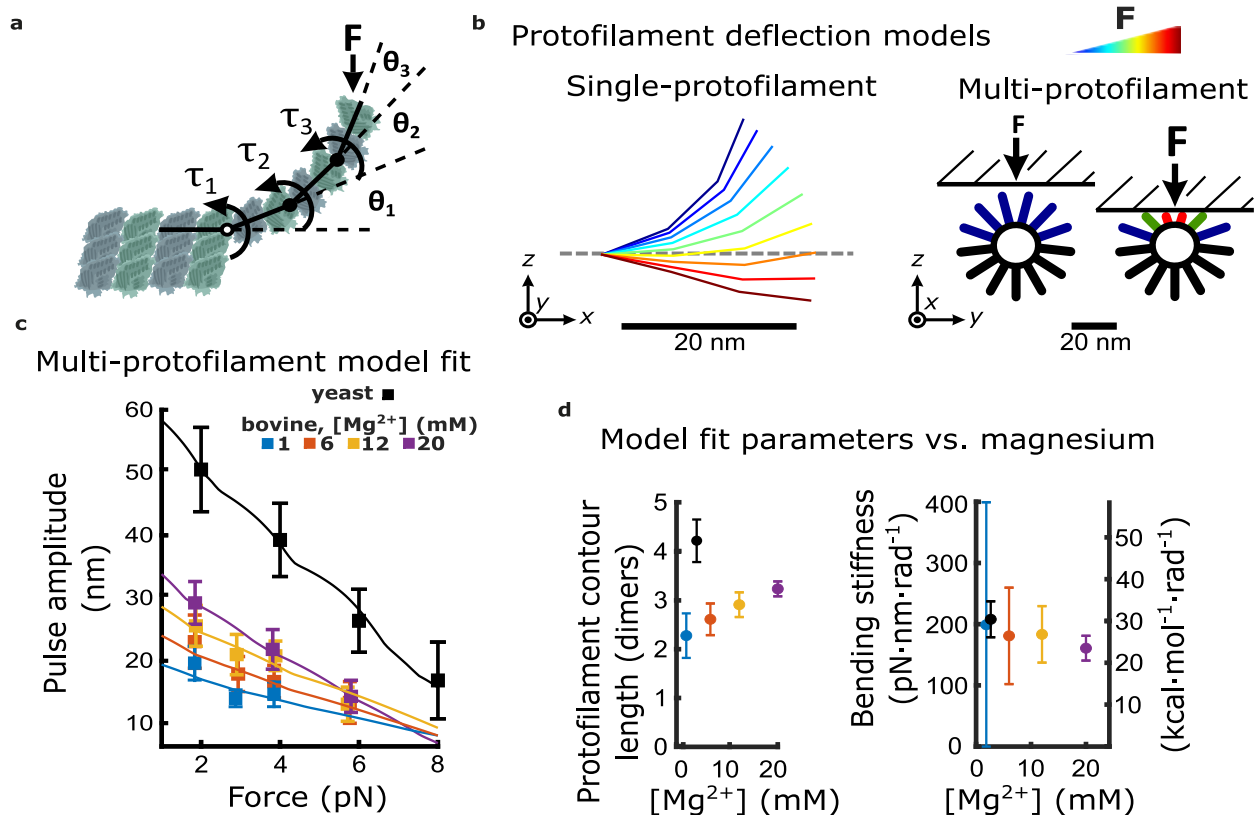

**Figure 4. Magnesium- and species-dependent increases in work output can be explained solely by a lengthening of protofilament curls.** (a) Model for bending of a single protofilament. Tubulin dimers are represented as rigid rods linked by Hookean torsion springs with relaxed angles of  $23^\circ$ . The springs are simplified representations of all contributions to elastic strain energy storage within a protofilament, including at intra- and inter-dimer interfaces, and within the core  $\alpha$ - and  $\beta$ -tubulin structures. An external force,  $F$ , perpendicular to the microtubule long-axis, is applied at the protofilament tip. The balance between  $F$  and the torsion at each bending node,  $\tau_n$ , is used to calculate the contour shape of the protofilament (i.e., the angles  $\theta_n$ ). (b) Calculated shapes for a single protofilament at different levels of external force (indicated by the color legend). Model for deflection of multiple protofilaments at a microtubule tip, seen end-on. Single protofilaments, modeled as in (a), are arranged radially according to the geometry of a 13-protofilament microtubule. The bead is modeled as a flat rigid surface, pushed downward onto the protofilaments to predict a force-deflection relationship. Cartoon at right shows distribution of protofilament deflections for an arbitrary bead height. (c) Amplitude versus force curves predicted by the multi-protofilament model, after fitting to measured pulse data (symbols) at indicated magnesium concentrations. Bovine data are recopied from Figure 3a. Yeast data combine new measurements with data previously published in (Driver, 2017). (d) Two fitted parameters, the mean contour length and bending stiffness (flexural rigidity) of protofilament curls, plotted versus magnesium concentration. The fitted contour length increases with added magnesium, and is larger for yeast microtubules, while the apparent flexural rigidity remains unchanged.

The following figure supplements are available for figure 4:

Figure 4—figure supplement 1: How force-deflection behavior of the single protofilament model changes with variation in the number of segments (dimers), the intrinsic bending stiffness, and the relaxed angle per tubulin dimer.

Figure 4—figure supplement 2: Table of estimates of protofilament curvature reported in the literature.

Figure 4—figure supplement 3: Estimates of protofilament curvature from micrographs of disassembling tips presented in Mandelkow et al. 1991.

Figure 4—figure supplement 4: Comparison of force-deflection relationship for a single protofilament, and multiple protofilaments arranged to reflect geometry at a microtubule tip.

Figure 4—figure supplement 5: Comparison of disassembly speeds for bovine versus yeast microtubules.



204 Given these assumptions, deflection of individual protofilaments varied according to their  
205 orientation relative to the bead surface (Figure 4b, right). A detailed analysis of changes in  
206 the force-deflection profile that occur with respect to changes in the average curvature,  
207 average dimers per curl, and flexural rigidity is shown in the supplemental material (Figure  
208 4-figure supplement 1).

209 To fit the behavior of this multi-protofilament model to the measured pulse amplitude  
210 versus force data at each magnesium concentration, we adjusted the average number of  
211 dimers in each curl (i.e., the curl contour length) and the stiffness of the bending springs.  
212 We kept the relaxed angle per dimer fixed at 23° because, in the absence of MAPs, the  
213 curvature of protofilaments at microtubule tips disassembling in vitro is consistently  
214 between 20° and 25° per dimer (Figure 4-figure supplement 2) and this curvature does not  
215 change appreciably with added magnesium (Figure 4-figure supplement 3) (Mandelkow et  
216 al., 1991) or calcium (Muller-Reichert, Chretien, Severin, & Hyman, 1998). Because the bead  
217 acts as a lever, measured axial displacements of the bead are larger than the lateral  
218 deflections of the protofilaments by a leverage factor of approximately 2-fold (Figure 1-  
219 figure supplement 2) (Driver et al., 2017). Predicted amplitude-vs-force curves were roughly  
220 linear, but with slight “ripples” that occurred because movement of the bead toward the  
221 microtubule gradually engaged more protofilaments (Figure 4c; Figure 4-figure  
222 supplement 4) (See Materials & Methods for details). Optimal fit parameters are plotted as  
223 functions of magnesium in Figure 4d.

224 The fitted contour lengths of protofilaments increased monotonically with added  
225 magnesium, from  $2.3 \pm 0.5$  dimers at 1 mM magnesium to  $3.2 \pm 0.2$  dimers at 20 mM.  
226 However, the fitted bending stiffness per dimer,  $175 \text{ pN}\cdot\text{nm}\cdot\text{rad}^{-1}$ , did not appreciably  
227 change with added magnesium (Figure 4d). These results suggest that magnesium increases  
228 pulse amplitude and work output by lengthening protofilament curls, without eliciting any  
229 change in their intrinsic stiffness or curvature.

### 230 *Curl elongation alone explains the larger pulses from yeast microtubules*

231 To understand why yeast microtubules generated larger, more energetic pulses relative to  
232 bovine microtubules, we fit our multi-protofilament model to the amplitude versus force  
233 data measured from microtubules composed entirely of recombinant yeast tubulin (Figure  
234 4c). As in our analysis of the bovine microtubule data, we allowed both the curl contour  
235 length and the stiffness of the bending springs to vary while keeping the relaxed angle per  
236 dimer fixed at 23°, consistent with cryo-ET tomograms of kinetochore microtubules in yeast  
237 (McIntosh et al., 2018). The contour length that best fit the yeast data,  $4.4 \pm 0.5$  dimers per  
238 curl, was 1.9-fold higher than the contour length inferred at identical magnesium  
239 concentration (1 mM) from the bovine data,  $2.3 \pm 0.5$  dimers per curl (Figure 4d). The  
240 bending stiffness per dimer that best fit the yeast data,  $206 \pm 44 \text{ pN}\cdot\text{nm}\cdot\text{rad}^{-1}$ , was  
241 statistically indistinguishable from that inferred from the bovine data (Figure 4d). These  
242 observations suggest that protofilament curls at yeast microtubule tips are longer but have  
243 the same intrinsic mechanical rigidity as the curls at bovine microtubule tips.

## Removing the $\beta$ -tubulin tail suppresses magnesium's enhancement of disassembly speed but not of pulse amplitude

Prior studies have suggested that longer protofilament curls might arise simply as a consequence of faster disassembly speeds (Tran et al., 1997). Consistent with this view, when we increased magnesium from 1 to 20 mM we observed a 3-fold increase in disassembly speed (Figure 2b) concomitant with a 1.6-fold increase in pulse amplitude (Figures 2d and 4c). Likewise, yeast microtubules disassembled 4-fold faster than bovine microtubules at 1 mM magnesium (Figure 4—figure supplement 5) and generated 3-fold larger pulses (Figure 4c). Faster disassembly speeds imply that GDP-tubulins lose their lateral bonds more quickly, which equivalently can be viewed as an accelerated rate of growth of the protofilament curls at disassembling tips. However, curl size is dictated not only by curl growth but also by curl breakage; steady state curl length will depend on a kinetic balance between the rates of curling and breakage (Tran et al., 1997). In principle, both these rates could vary in a magnesium-dependent manner. To distinguish the potential influence of magnesium on curl breakage from its obvious effect on disassembly speed (and therefore on curl growth rate), we sought a method to slow bovine microtubule disassembly at elevated levels of magnesium. A recent discovery pointed to one such method. Fees & Moore found that removing the  $\beta$ -tubulin C-terminal tail, by treating microtubules with the protease subtilisin, suppresses the effect of magnesium on disassembly speed (Fees & Moore, 2018). Thus, at high magnesium concentration, subtilisin-treated microtubules disassemble much more slowly than untreated microtubules. If magnesium lengthens protofilament curls solely because it accelerates disassembly, then subtilisin treatment should suppress the magnesium-dependent enlargement of pulses in the wave assay.

Contrary to this prediction, however, subtilisin treatment did not reduce pulse amplitudes in the wave assay. Consistent with the prior work of Fees and Moore, we found that subtilisin treatment for 10 to 20 minutes was sufficient to remove the  $\beta$ -tubulin C-terminal tail (Figure 5a) and to suppress almost completely the magnesium-dependent acceleration of disassembly (Figure 5b). While disassembly of untreated control microtubules was strongly accelerated, from 400 to 1,200 nm·s<sup>-1</sup>, when magnesium was increased from 1 to 20 mM, the disassembly after 10 or more minutes of subtilisin treatment was consistently slower and remained at approximately 300 nm·s<sup>-1</sup> across the same range of magnesium levels. Despite this strikingly slower disassembly, the mean pulse amplitude measured in the wave assay after subtilisin-treatment remained at least as large as that measured in controls with untreated tubulin (Figure 5c). At 20 mM magnesium, the mean pulse amplitude generated after 5 to 10 min of subtilisin treatment was 30 to 40 nm (respectively), a size very similar to (or even slightly larger than) the mean amplitude generated by untreated microtubules, which was 28 nm. This observation indicates that magnesium enlarges protofilament curls independently of its acceleration of disassembly and suggests that distinct magnesium-binding sites probably underlie these two effects.

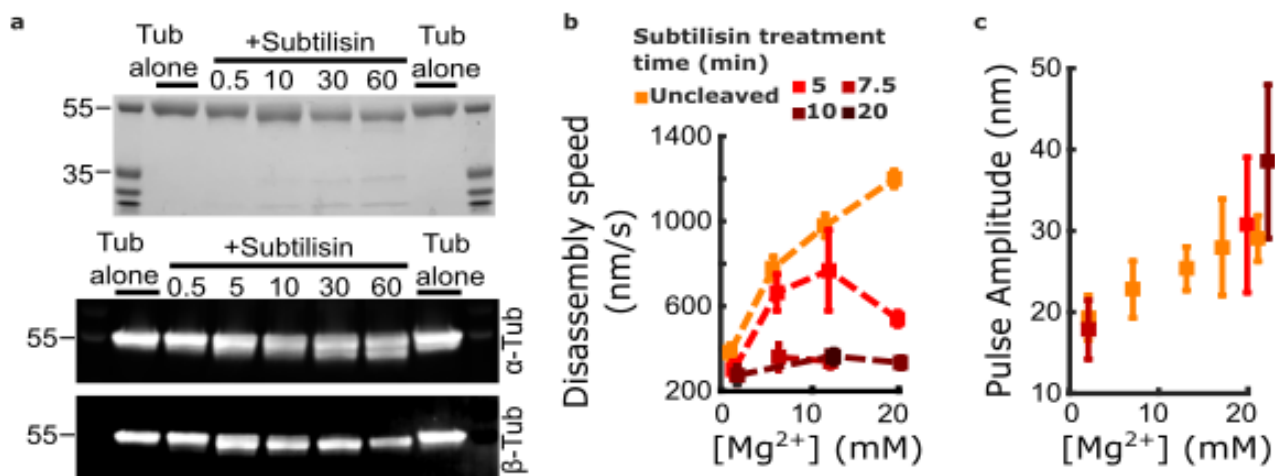

**Figure 5. Removing the  $\beta$ -tubulin C-terminal tail suppresses magnesium's acceleration of disassembly speed but not its enhancement of pulse amplitude.** (a) Proteolytic products of tubulin treated with subtilisin for the indicated times (in minutes), before quenching with 1 mM PMSF, visualized by Coomassie staining (top image) or Western blotting (bottom image).  $\alpha$ Tub DM1A:FITC mouse conjugate 1:1000 and  $\beta$ Tub CST 9F3 rabbit 1:1000 were used for primary antibody staining. (b) Mean disassembly speeds, measured after treatment of tubulin with subtilisin for the indicated durations and plotted versus magnesium concentration. The large magnesium-dependent acceleration of disassembly seen with untreated tubulin (orange symbols) was suppressed after 10 – 20 min subtilisin treatment (dark red symbols). Error bars represent 95% confidence intervals, defined as  $\pm (t \cdot SEM)$ , where  $t$  is drawn from Student's  $t$ -distribution (with  $\nu = N - 1$  degrees of freedom and  $N = 5 - 51$  samples per mean). Data for untreated tubulin recopied from Figure 2b. (c) Pulse amplitudes, measured in the wave assay at 2 pN trapping force after treatment of tubulin with subtilisin, plotted versus magnesium concentration. Symbol colors indicate subtilisin treatment times according to the legend of (a). Treatment with subtilisin did not suppress the effect of magnesium on pulse amplitude. Error bars represent 95% confidence intervals, defined as  $\pm (t \cdot SEM)$ , where  $t$  is drawn from Student's  $t$ -distribution (with  $\nu = N - 1$  degrees of freedom and  $N = 28 - 44$  samples per mean).

285

## Discussion:

286

### *Yeast and mammalian microtubules store similar lattice strain energies*

287

288

289

290

291

292

293

294

295

296

297

298

299

300

301

Fitting wave assay data with the multi-protofilament model has allowed us to directly estimate a key biophysical property of curling protofilaments at disassembling microtubule tips: their flexural rigidity. Previously, this property was only inferred indirectly, from static cryo-electron tomograms (McIntosh et al., 2018), or from stiffness measurements of intact microtubules (Hawkins, Mirigian, Yasar, & Ross, 2010; Kononova et al., 2014) (Molodtsov, Grishchuk, Efremov, McIntosh, & Ataullakhanov, 2005; VanBuren, Cassimeris, & Odde, 2005). Our fitted estimate for bending stiffness,  $175 \text{ pN}\cdot\text{nm}\cdot\text{rad}^{-1}$ , implies that fully straightening a protofilament from its relaxed curvature into a lattice-compatible state would require approximately  $17 k_B T$ , or  $10 \text{ kcal/mol}$  of work energy per tubulin dimer. This represents a very substantial fraction ( $\sim 80\%$ ) of the free energy available from GTP hydrolysis,  $\sim 12.3 \text{ kcal/mol}$  (Desai & Mitchison, 1997; Howard, 1996), consistent with previous suggestions that most of the energy derived from hydrolysis is stored as curvature strain in the microtubule lattice (Caplow, Ruhlen, & Shanks, 1994), and consistent with our previous lower-bound estimate (Driver et al., 2017). Moreover, our analysis suggests that the flexural rigidity of curling protofilaments is conserved between yeast and bovine tubulin

302 and therefore that the amount of strain energy stored per tubulin dimer in the microtubule  
303 lattice is probably also conserved.

304 The idea that protofilament flexural rigidity and stored lattice strain are conserved, despite  
305 a billion years of evolution separating yeast and vertebrates, suggests that these biophysical  
306 properties are crucial to microtubule function. Indeed, most current models assume that  
307 microtubule dynamic instability arises from the counteracting influences of lateral bonding  
308 versus lattice strain, which tend to stabilize and destabilize the polymer, respectively  
309 (Gudimchuk et al., 2020; McIntosh et al., 2018; VanBuren et al., 2005; VanBuren, Odde, &  
310 Cassimeris, 2002). Given the importance of dynamic instability for cell viability, there may  
311 be strong selective pressure to maintain a specific lattice strain energy.

### 312 *Protofilament curl length can affect mechanical work output*

313 In contrast to their consistent flexural rigidity, the average length of protofilament curls at  
314 disassembling microtubule tips can vary widely depending on tubulin species and buffer  
315 conditions (McIntosh et al., 2018; McIntosh et al., 2013). By our estimates, the average curl  
316 length grew ~50% as magnesium was increased from 1 to 20 mM. And curls at yeast  
317 microtubule tips were ~2-fold larger than those at bovine microtubule tips. These curl  
318 enlargements were associated with greater mechanical work output in the wave assay, as  
319 expected, since longer curls store more elastic energy and can push the bead laterally  
320 farther away from the microtubule surface. Whether longer protofilament curls can  
321 similarly enhance microtubule-driven motility in vivo remains unknown. In budding yeast,  
322 where each kinetochore attaches a single microtubule tip (Winey et al., 1995) and robust  
323 tip-coupling depends on the ring-forming Dam1 complex (Miranda, De Wulf, Sorger, &  
324 Harrison, 2005; Umbreit et al., 2014; Westermann et al., 2005; Westermann et al., 2006), a  
325 minimum curl length might be required for a microtubule-encircling Dam1 ring to efficiently  
326 harness curl energy via the conformational wave mechanism (Molodtsov et al.,  
327 2005). However, beyond a certain length, further enlargement of the curls might not be  
328 beneficial. In other species whose kinetochores attach numerous microtubule tips and lack  
329 any ring-forming complexes, coupling might depend less on the conformational wave  
330 mechanism and instead might rely on biased diffusion. An attractive idea is that the larger  
331 and more energetic pulses produced by yeast microtubules in the wave assay, as compared  
332 to bovine microtubules, might reflect stronger selective pressure to maintain long  
333 protofilament curls in yeast, because yeast might depend more heavily on long curls for  
334 mitosis. Alternatively, plus end-binders (+TIPs) and other microtubule-associated proteins  
335 that alter microtubule tip morphology (Cassimeris, Gard, Tran, & Erickson, 2001; Desai,  
336 Verma, Mitchison, & Walczak, 1999; Farmer, Arpa, Hall, & Zanic, 2021; Girao et al., 2020;  
337 Kerssemakers et al., 2006) could enlarge (or stiffen) protofilament curls, potentially  
338 enhancing their mechanical work output in a spatiotemporally regulated manner.

### 339 *Magnesium directly inhibits the breakage of protofilament curls*

340 Our measurements also reveal new information about the relationship between  
341 disassembly speed and protofilament curl length, and about the mechanisms by which  
342 magnesium affects these tip properties. Classic work suggested that elongation of  
343 protofilament curls by magnesium might be a simple indirect consequence of its  
344 acceleration of disassembly (Tran et al., 1997). However, in 20 mM magnesium, subtilisin-  
345 treated microtubules disassembled three-fold more slowly than untreated controls and yet  
346 their pulse amplitudes remained consistently elevated, at well over 30 nm on average.  
347 Likewise, we previously showed that microtubules composed of a hyperstable T238V

348 mutant tubulin disassemble seven-fold more slowly and yet they generated pulses with  
349 amplitudes indistinguishable from wild-type (Driver et al., 2017). These observations  
350 indicate that disassembly speed and curl length are not strictly coupled, and that  
351 magnesium-dependent enlargement of protofilament curls is not simply a consequence of  
352 accelerated disassembly. Rather, magnesium must directly inhibit the breakage of  
353 protofilament curls.

354 The effects of magnesium on disassembly speed and on curl length appear to be mediated  
355 by different interaction sites on tubulin. Magnesium's acceleration of disassembly depends  
356 on the  $\beta$ -tubulin C-terminal tail, since this effect is suppressed upon removal of the  $\beta$ -tail by  
357 subtilisin (Fees & Moore, 2018). But subtilisin treatment did not suppress the effect of  
358 magnesium on pulse amplitudes in the wave assay, indicating that magnesium inhibits curl  
359 breakage through another interaction site (or sites), outside the  $\beta$ -tail. The C-terminal tail  
360 on  $\alpha$ -tubulin is more resistant to subtilisin proteolysis and was left partially intact by our  
361 treatment (Figure 5a). Therefore, one possibility is that magnesium stabilizes protofilament  
362 curls by interacting with the  $\alpha$ -tubulin tail. Alternatively, the effect might depend on an  
363 interaction with GDP in the exchangeable nucleotide-binding site, which is located at the  
364 inter-dimer interface. The affinity of magnesium for GDP in the exchangeable site is  
365 reportedly in the millimolar range (Correia, Baty, & Williams, 1987; Mejillano & Himes,  
366 1991), which is much weaker than its affinity for GTP, and within the range where we  
367 measured increased pulse amplitudes.

### 368 *Tuning curl properties could facilitate rigorous testing of their* 369 *importance for kinetochore motility*

370 The ability to tune protofilament curl properties by adjusting magnesium levels or tubulin  
371 isoforms suggests new approaches for testing the importance of curling protofilaments in  
372 kinetochore motility. If curling protofilaments exert force to drive kinetochore movement,  
373 as proposed in conformational wave-based models, then elongating the curls could enable  
374 protofilaments to push more productively against the kinetochore, potentially changing the  
375 processivity, attachment strength, or switching behavior of the kinetochore-microtubule  
376 interface. In addition, we anticipate using our wave assay and the analytical tools described  
377 here to explore other methods for modifying biophysical properties of protofilament curls.  
378 In particular, the ability to tune bending stiffness or intrinsic curvature would provide  
379 additional ways to test the importance of protofilament curls in microtubule-based motility.

## 380 **Materials and Methods:**

### 381 **Purification of tubulin from bovine brain**

382 Tubulin was purified from bovine brain using two cycles of polymerization and  
383 depolymerization to a final concentration of 200  $\mu$ M (Castoldi & Popov, 2003). Samples were  
384 frozen in liquid N<sub>2</sub> and stored at -80°C.

### 385 **Purification of recombinant His<sub>6</sub>-tubulin from yeast:**

386 Plasmids to express wild-type yeast  $\alpha\beta$ -tubulin with a His<sub>6</sub> tag fused to the C-terminus of  $\beta$ -  
387 tubulin were previously described (Ayaz et al., 2014, 2012; Johnson et al., 2011). A plasmid  
388

389 to express the T238V mutation of Tub2p (yeast  $\beta$ -tubulin) was made by QuikChange  
390 mutagenesis (Stratagene), using an expression plasmid for wild-type Tub2 as template and  
391 with primers designed according to the manufacturer's instructions. The integrity of all  
392 expression constructs was confirmed by DNA sequencing. Wild-type or mutant yeast  $\alpha\beta$ -  
393 tubulin was purified from inducibly overexpressing strains of *S. cerevisiae* using nickel  
394 affinity and ion exchange chromatography (Ayaz et al., 2014, 2012; Johnson et al., 2011).  
395 Tubulin samples for the laser trap assays were prepared at UT Southwestern, aliquoted and  
396 snap-frozen in storage buffer (10 mM PIPES pH 6.9, 1 mM MgCl<sub>2</sub>, 1 mM EGTA) containing 50  
397 mM GTP, shipped on dry ice to the University of Washington, and stored at -80°C.

### 399 Slide preparation for wave assay

400 For each experiment, a small channel ~1 mm wide was formed by bonding a KOH-cleaned  
401 glass coverslip to a clean glass slide using two parallel strips of double-stick tape.  
402 Biotinylated bovine serum albumin (Vector Laboratories B-2007-10) was incubated on the  
403 slide for 15 min, then washed with 80  $\mu$ L warm BRB80. Avidin DN (Vector Laboratories A-  
404 3100-1) was incubated on the slide for 5 min, then washed with 40  $\mu$ L warm BRB80.  
405 GMPCPP-stabilized, biotinylated microtubule seeds were assembled from bovine brain  
406 tubulin (Castoldi & Popov, 2003) and porcine biotin tubulin (Cytoskeleton, Cat #T333), and  
407 incubated on the coverslip for 5 min before washing with growth buffer (1 mM GTP in BRB80  
408 80 mM PIPES, 120 mM K<sup>+</sup>, 1 mM MgCl<sub>2</sub> and 1mM EGTA, pH 6.8). Anti-His beads were sparsely  
409 functionalized with His<sub>6</sub>-yeast tubulin and added to growth buffer containing 10-25  $\mu$ M  
410 bovine tubulin, this reaction mixture was added to the seed-decorated coverslip. The slide  
411 was then sealed with nail polish and mounted on the optical trap. A protocol for slide  
412 preparation is detailed in our prior publication (Murray et al., 2022) .

### 413 Trapping instrument

414 The optical trap instrument used for this assay has been described in previous work (Franck  
415 et al., 2010). The instrument was based around a Nikon inverted microscope (TE2000) with  
416 a Nikon 100 $\times$  1.4 NA oil Plan Apo IR CFI objective. A 1064-nm Nd:YVO<sub>4</sub> laser (Spectra Physics  
417 J20-BL10-106Q) was used as a trapping beam, focused at the center of the field of view. A  
418 473-nm laser (LaserPath Technologies, DPSS-473-100) was used as a microtubule cutting  
419 beam, focused into an ellipse at an intermediate distance between the trap center and edge  
420 of the field of view. Both lasers were actuated by shutters (Vincent Associates, VS25S2ZMO).  
421 Microtubules and beads were visualized by video enhanced differential interference  
422 contrast (VE-DIC), with illumination by a mercury arc lamp (X-Cite 120) and phase contrast  
423 accomplished through two standard Wollaston prisms and polarizers (Walker et al., 1988).  
424 Motion control and force-feedback was implemented through servo-control of a three-axis  
425 piezo stage with internal capacitive position sensors (Physik Instrumente, P-517.3CL) and a  
426 piezo controller (Physik Instrumente, E-710). Custom software written in LabVIEW (National  
427 Instruments) was used for instrument control and data acquisition. The source code is  
428 publicly available at <https://github.com/casbury69/laser-trap-control-anddata-acquisition>.  
429 Briefly, analog signals from the position sensor were sampled at 40 kHz using an analog-to-  
430 digital conversion board (National Instruments, PCI-6251). Commands were sent to the  
431 piezo stage controller through a GPIB digital interface (National Instruments, GPIB-USB-B).  
432 Both the bead and stage positions were downsampled to 200 Hz for file storage.

433

### Measurement of pulses driven by protofilament curling

434

435

436

437

438

439

440

441

442

443

444

445

446

447

Suitable beads laterally attached to coverslip-anchored microtubules were identified. Suitable microtubules were firmly anchored by one end to the slide surface, and able to freely rotate about their surface anchor, without other interfering microtubules bundled alongside or crossing along their length. To establish the initial loaded state, the laterally attached bead was trapped and the microtubule and bead were pulled in the opposite the direction of the tether, towards the cutting laser location. The beads were raised slightly above the coverslip surface to ensure the surface did not interfere with measurement. The force clamp was initiated, and microtubule depolymerization initiated by trimming off the stabilizing cap using the cutting laser. Position signals from the trapped bead were recorded using the force clamp software (described above under Trapping Instrument), including the static baseline position, as well as the pulse derived from protofilament curling motion. Pulses were evaluated for inclusion in data analysis on the basis of their amplitude relative to the standard deviation of the baseline noise; a criteria of 3 times the standard deviation was used to accept or reject pulses, as detailed in our prior publication (Murray et al., 2022).

448

### Measurement of microtubule disassembly speeds

449

450

451

452

453

454

Slides were prepared as described above in Slide preparation for Wave Assay, but without the addition of yeast-tubulin decorated beads. Microtubules were visualized by VE-DIC and recorded using a digital video disc recorder (DVD-R, model & manufacturer). The stabilizing GTP-caps of microtubules were trimmed off using laser scissors to induce disassembly. Disassembly speeds of individual microtubules were measured using imageJ and mTrackJ (Meijering, Dzyubachyk, & Smal, 2012).

455

### Multi-protofilament model

456

457

458

459

460

Single protofilaments were modeled as a series of rigid rods linked by Hookean bending springs with an angular spring constant,  $\kappa$ , and a non-zero relaxed angle  $\theta_i$  (Figure 4a), and a segment length  $r = 8.2$  nm. A downwards force at the protofilament tip was balanced by the torque at each spring node to yield a system of nonlinear equations (see equations 1 to 3 for a 4-node, 3-segment system).

$$\tau_3 = Fr \cos(\theta_1 + \theta_2 + \theta_3) - \kappa(\theta_3 - \theta_i) \quad \text{equation 1}$$

$$\tau_2 = Fr[\cos(\theta_1 + \theta_2) + \cos(\theta_1 + \theta_2 + \theta_3)] - \kappa(\theta_2 - \theta_i) \quad \text{equation 2}$$

$$\tau_1 = Fr[\cos(\theta_1) + \cos(\theta_1 + \theta_2) + \cos(\theta_1 + \theta_2 + \theta_3)] - \kappa(\theta_1 - \theta_i) \quad \text{equation 3}$$

461

462

463

464

465

466

The system of non-linear equations was solved numerically for the angle at each node ( $\theta_1, \theta_2, \theta_3, \dots$ ) using a variant of the Powell dogleg method (Powell, 1970), for a range of forces and a given set of parameters  $\kappa$  and  $\theta_i$ . Using the angles ( $\theta_1, \theta_2, \theta_3, \dots$ ), the deflection of the protofilament tip was calculated at each force. This method was repeated for modeled protofilaments of lengths 1 to 5 segments.

467

468

469

The force-deflection relationship for protofilaments at a microtubule interacting with a bead were calculated as follows: The bead was assumed to be an infinitely flat, rigid surface as the 440-nm beads used in experiments were nearly 20-fold larger in diameter than the

470 microtubules. Protofilaments were assumed to be distributed radially about the  
471 microtubule axis in a 13-protofilament configuration. Bending was only allowed in the plane  
472 traversed by the microtubule axis and the protofilament axis; it has been observed in  
473 electron microscopy that such a plane includes the majority of deviations in protofilament  
474 position (McIntosh et al., 2018). The position of the bead surface was varied from where it  
475 contacted the most apical (upwards pointing) protofilaments, down to the microtubule wall.  
476 Accordingly, groups of protofilaments were engaged sequentially based on their distribution  
477 around the microtubule tip (Figure 4b, right). This sequential engagement of protofilaments  
478 manifested as slight ripples in the force-deflection curve and changed slightly depending on  
479 the rotational angle of the microtubule tip (Figure 4—figure supplement 4). To consider a  
480 variety of possible rotational angles, the force-deflection curves for the two microtubule tip  
481 rotations depicted in Figure 4—figure supplement 4 were averaged together prior to fitting.

### 482 **Multi-protofilament model fitting**

483 To fit the multi-protofilament model to the pulse amplitude vs. force data, the amplitude  
484 data was first converted to bead-to-MT surface height, assuming a 36-nm tether length  
485 (Figure 1—figure supplement 2). The model was fit to the data using a Levenberg-Marquardt  
486 nonlinear least-squares algorithm with inverse-variance weights, yielding the fitted force-  
487 deflection relationship, and parameters for the stiffness per tubulin dimer and the average  
488 contour length. 95% confidence intervals were calculated using the Jacobian for each  
489 parameter.

### 490 **Digestion of tubulin with subtilisin**

491 To cleave the C-terminal tails from tubulin, bovine brain tubulin was thawed quickly, and  
492 mixed to a final concentration of 100  $\mu$ M with 1% m/m subtilisin (Sigma Aldrich P5380) in a  
493 buffer containing 1 mM GTP, 8 mg/mL BSA, 80 mM PIPES, 120 mM K<sup>+</sup>, 1 mM MgCl<sub>2</sub>, 1mM  
494 EGTA, pH 6.8, and immediately placed at 30°C. To halt the cleavage reaction,  
495 phenylmethylsulfonyl fluoride (PMSF) was added to a final concentration of 1 mM and the  
496 cleavage product placed on ice.

### 497 **Western Blotting**

498 Samples were run on a 7.5% Bis-Tris SDS-PAGE gel and transferred to polyvinylidene  
499 difluoride membranes. The membranes were blocked for one hour with 1:1 1xPBS and  
500 Odyssey Blocking Buffer (Cat No.: 927-40000; LICOR Biosciences). Primary and secondary  
501 antibodies were diluted in 1:1 1xPBS and Odyssey Blocking Buffer. The blots were incubated  
502 for one hour with the following primary antibodies:  $\beta$ Tub (9F3; Cell Signaling Technology)  
503 rabbit 1:1000,  $\alpha$ Tub DM1A:FITC (Sigma F2168) mouse conjugate 1:1000. The blots were  
504 washed 3x with PBST (1x PBS and .01% Tween-20). The blots were incubated with secondary  
505 antibodies diluted in 1:1 1xPBS and Odyssey Blocking Buffer, IRDye<sup>®</sup> 680RD Goat anti-Mouse  
506 IgG Secondary Antibody (Licor 926-68070) 1:5000, IRDye<sup>®</sup> 800CW Goat anti-Rabbit IgG  
507 Secondary Antibody (Licor 926-32211) 1:5000. The blots were washed 3x with PBST and 1x  
508 with PBS, then imaged with a Licor Odyssey DLx imaging system (LI-COR Biosciences). Images  
509 were adjusted for brightness and contrast with Image-J software.



510

### **Data availability**

511

All data generated and analyzed during this study are included in the manuscript and supporting files. Source data files are provided with all the individual wave amplitude values and disassembly speeds for Figures 2 – 5 and their supplements.

512

513

514

515

### **Acknowledgements:**

516

We are grateful for critical reading of the manuscript and feedback from Trisha N. Davis, Linda Wordeman, Joshua D. Larson, Bonnibelle K. Leeds, and John J. Correia. The authors declare no competing financial interest.

517

518

519

520

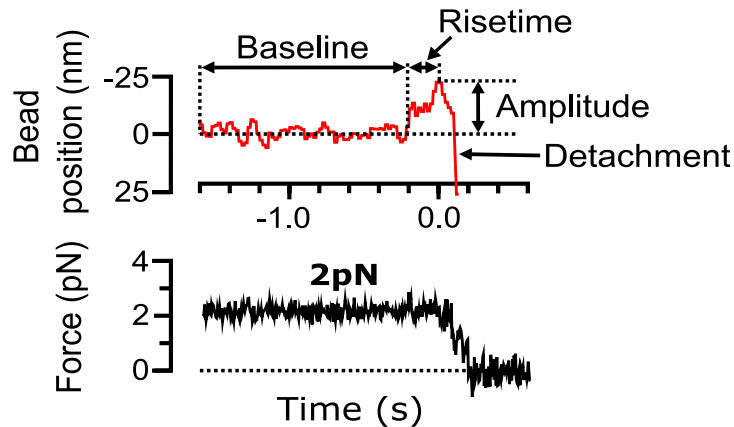

**Figure 1—figure supplement 1. Features of bead pulse motion generated by curling protofilaments.** Example record of bead position and trapping force versus time, measured during disassembly of a bovine brain tubulin microtubule in 1 mM magnesium. The bead position trace (red, top graph) prior to the pulse is characterized by a baseline noise. The pulse is parameterized by a risetime, the duration over which the signal increases from the baseline to the pulse peak. The height of the pulse from the baseline is defined as the pulse amplitude. After the pulse, the bead detaches from the microtubule and the trap pulls the bead rapidly in the direction of applied force. Corresponding force trace (black, bottom graph) shows force is clamped (maintained at a steady level) until bead detachment.

521

522

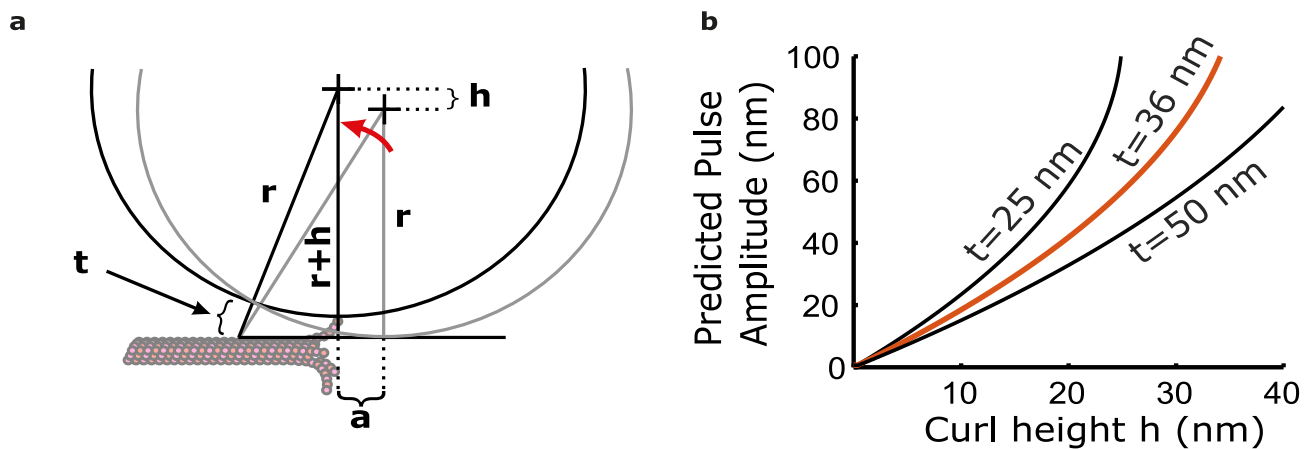

**Figure 1—figure supplement 2. The bead and tether form a leverage system that amplifies protofilament curling motion.** (a) Leverage given geometric constraints of bead and tether. Protofilament curl height " $h$ " is amplified to a larger horizontal distance " $a$ ". (b) Relationship between pulse amplitude and curl height from the lattice given three different tether lengths ( $t = 25, 36,$  and  $50$  nm). Based on the composition of the tether, we estimate a length of  $t = 36$  nm.

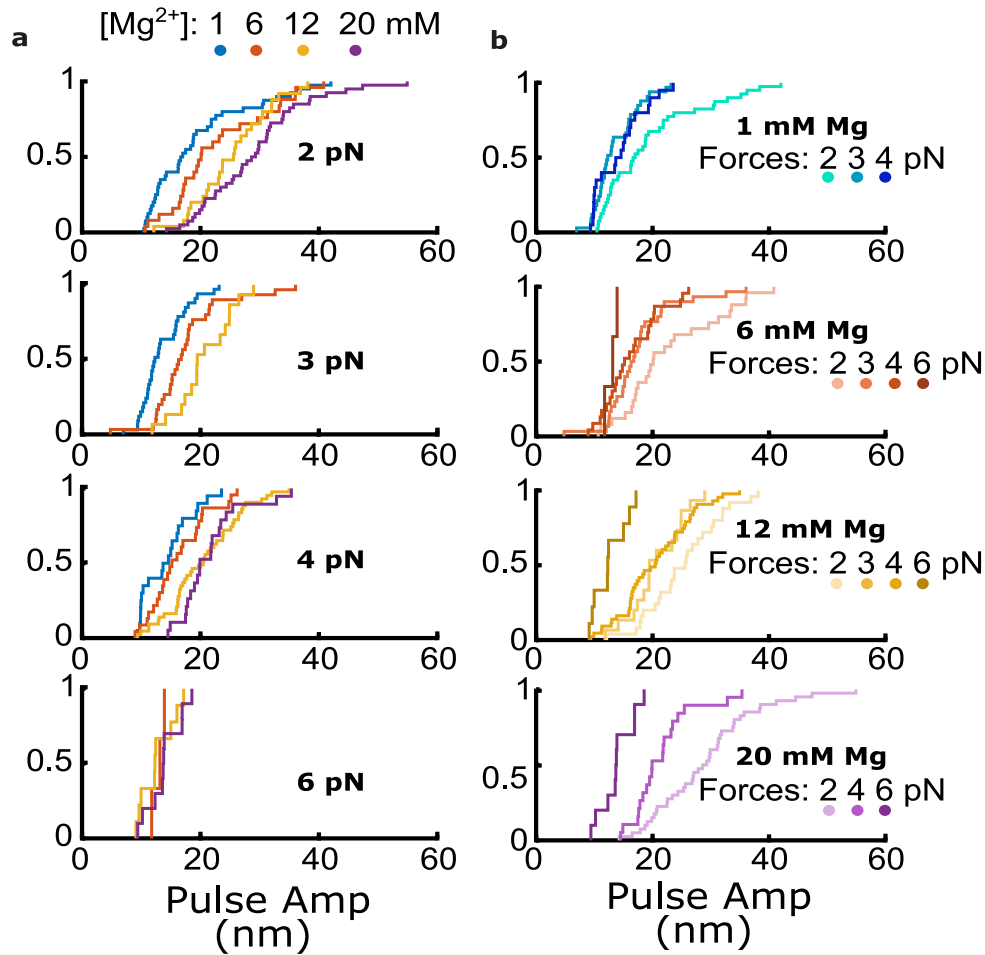

**Figure 3—figure supplement 1. Cumulative distributions of pulse amplitude measured with bovine tubulin at different trapping forces and magnesium levels. (a)** Cumulative distributions of pulse amplitude grouped together according to the trapping forces at which they were measured. Magnesium concentrations are denoted by color as indicated. **(b)** Cumulative distributions of pulse amplitude grouped together according to the magnesium concentrations at which they were measured. Trapping forces are denoted by color as indicated.

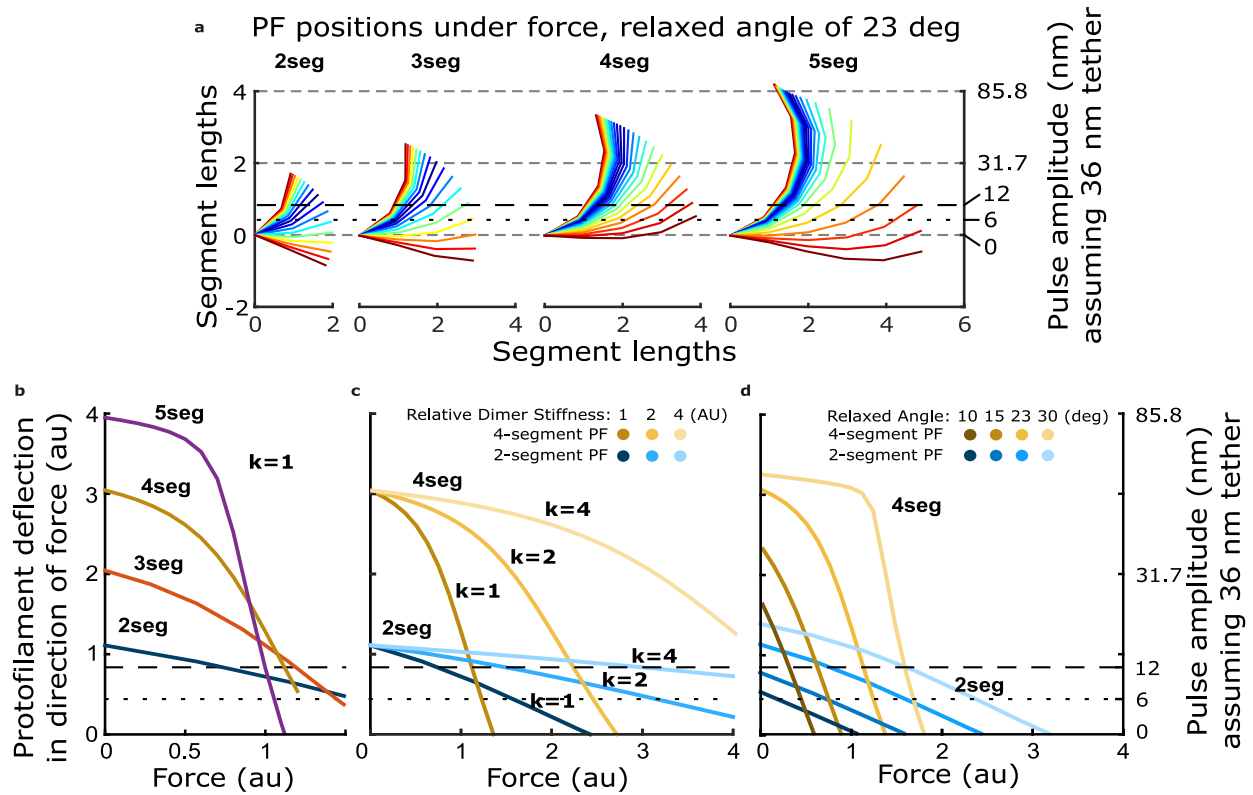

**Figure 4–figure supplement 1. How force-deflection behavior of the single protofilament model changes with variation in the number of segments (dimers), the intrinsic bending stiffness, and the relaxed angle per tubulin dimer. (a) Model solutions for protofilament contour lengths of 2 to 5 segments, under a range of forces. Color indicates magnitude of force. (b) Deflection of the protofilament tip as a function of force for protofilaments of 2 to 5 segments. (c) Deflection of the tip for protofilaments 2 and 4-segments in length, with the stiffness per dimer varied 2- and 4-fold above that used in Figure 4. (d) Deflection of the tip for protofilaments 2 and 4-segments in length, with the relaxed dimer angle varied across 10, 15, 23, and 30 degrees.**

**Figure 4–figure supplement 2: Table of estimates of protofilament curvature reported in the literature.** Each row is colored to reflect the method used to estimate protofilament curvature.

| <i>Curvature (degrees per dimer)</i> | <i>SE</i> | <i>Measured from</i> | <i>Ligand(s)</i>           | <i>Description</i>                                                                                                                                              | <i>Reference</i> |
|--------------------------------------|-----------|----------------------|----------------------------|-----------------------------------------------------------------------------------------------------------------------------------------------------------------|------------------|
| 27.8                                 |           | Cryo 2D              | Presumed GDP               | Curvature measured from diameter of PF curl 1 mM Mg <sup>2+</sup>                                                                                               | Mandelkow 1991   |
| 24.8                                 |           | Cryo 2D              | Presumed GDP               | Curvature measured from diameter of PF curl 20 mM Mg <sup>2+</sup>                                                                                              | Mandelkow 1991   |
| 20.2                                 | 12.1      | Cryo-ET trace        | Presumed GDP               | Cytoskeleton porcine tubulin grown from axonemes, with disassembly induced by isothermal dilution, BRB80 (1 mM Mg <sup>2+</sup> ). Average length of 43 ± 16 nm | McIntosh 2018    |
| 19.3                                 | 13.1      | Cryo-ET trace        | Presumed GTP               | Cytoskeleton porcine tubulin grown from axonemes, BRB80 (1 mM Mg <sup>2+</sup> ). Average length of 36 ± 15 nm                                                  | McIntosh 2018    |
| 26                                   | N/A       | crystal structure    | stathmin, GDP, colchicine  | Colchicine known to induce curvature, curvature looks very close by eye when aligned by $\alpha$ -tub to structures submitted by Nawrotek et al.                | Ravelli 2004     |
| 22                                   | N/A       | crystal structure    | DARPin, GTP                | DARPin binds at exposed terminus of $\beta$ -tub, structure shows GTP bound at both E and N-sites.                                                              | Pecquer 2012     |
| 19                                   | N/A       | crystal structure    | stathmin, GTP, GDP, GmpCpp | regardless of ligand at E-site, curvature remains seemingly constant. Stathmin may impose substantial influence on curvature*                                   | Nawrotek 2011    |
| 21                                   | 13        | Cryo-ET trace        | Presumed GTP               | 10 $\mu$ M Cytoskeleton porcine tubulin, growing MT                                                                                                             | Gudimchuck 2020  |
| 21                                   | 14        | Cryo-ET trace        | Presumed GTP               | 20 $\mu$ M Cytoskeleton porcine tubulin, growing MT                                                                                                             | Gudimchuck 2020  |
| 18                                   | 13        | Cryo-ET trace        | Presumed GTP               | 40 $\mu$ M Cytoskeleton tubulin, growing MT                                                                                                                     | Gudimchuck 2020  |
| 21                                   | 11        | Cryo-ET trace        | Presumed GTP               | $\alpha$ 1B/ $\beta$ I+ $\beta$ IVb tubulin, growing                                                                                                            | Gudimchuck 2020  |
| 22.9                                 |           |                      |                            | Assumed curvature of relaxed tubulin per model proposed (conversion from 0.2 rad)                                                                               | Gudimchuck 2020  |
| 12                                   | 12.3      | Cryo-ET trace        | In vivo                    | KMT-PTK-meta 51 ± 21 nm length, 1,465 PF traces                                                                                                                 | McIntosh 2018    |
| 13.7                                 | 11.8      | Cryo-ET trace        | In vivo                    | KMT-PTK-ana 13.7 ± 11.8 nm length, 192 PF traces                                                                                                                | McIntosh 2018    |
| 17.8                                 | 12.8      | Cryo-ET trace        | In vivo                    | KMT-Chlamy-meta 42 ± 15 nm length, 700 PF traces                                                                                                                | McIntosh 2018    |
| 16.3                                 | 13.6      | Cryo-ET trace        | In vivo                    | KMT-Chlamy-ana 54 ± 14 nm length, 452 PF traces                                                                                                                 | McIntosh 2018    |
| 17.9                                 | 14.5      | Cryo-ET trace        | In vivo                    | KMT-CEleg-meta 44 ± 17 nm length, 315 PF traces                                                                                                                 | McIntosh 2018    |
| 22.9                                 | 19.1      | Cryo-ET trace        | In vivo                    | KMT-CEleg-ana 49 ± 18 nm length, 461 PF traces                                                                                                                  | McIntosh 2018    |

|      |      |                        |                             |                                                                                                                                                        |                        |
|------|------|------------------------|-----------------------------|--------------------------------------------------------------------------------------------------------------------------------------------------------|------------------------|
| 21.1 | 17.5 | Cryo-ET trace          | In vivo                     | KMT-Cerevis-meta 27 ± 11 nm length, 449 PF traces                                                                                                      | McIntosh 2018          |
| 24.6 | 81.9 | Cryo-ET trace          | In vivo                     | KMT-Cerevis-ana 31 ± 12 nm length, 539 PF traces                                                                                                       | McIntosh 2018          |
| 11.5 | 5.7  | Oligomer fit (Cryo 2D) | GTP                         | Oligomers in early stages of assembly (Drosophila tubulin), GTP                                                                                        | Ayukawa 2021           |
| 15.8 | 5.6  | Oligomer fit (Cryo 2D) | GDP                         | Oligomers in early stages of assembly (Drosophila tubulin), GDP                                                                                        | Ayukawa 2021           |
| 9.4  |      | Cryo-ET                |                             | Tubulin sheets at MT tips (density is indistinguishable from dark moire fringe that defines MT wall, indicating multiple PF's in gently curving sheet. | Guesdon 2016           |
| 1    |      | Cryo 2D                |                             | Finds miniscule curvatures from MT groups/sheets nucleated from axonemes (~1 deg/dimer)                                                                | Orbach and Howard 2019 |
| 25.8 | 0.21 | Cryo 2D                | GTP or GDP                  | measured by ring diameter of curling PF's at tips, did not differentiate between assembling and disassembling                                          | Vemu 2017              |
| 8    |      | Oligomer trace         | GTP                         | 50 μM brain tub                                                                                                                                        | Howes 2018             |
| 10   |      | Oligomer trace         | GDP                         | 50 μM brain tub                                                                                                                                        | Howes 2018             |
| 6    |      | Oligomer trace         | GTP                         | 10 μM yeast tubulin                                                                                                                                    | Howes 2018             |
| 8    |      | Oligomer trace         | GDP                         | 10 μM yeast tubulin                                                                                                                                    | Howes 2018             |
| 23.5 | 6    | Cryo 2D                | GDP, 4 mM Ca <sup>2+</sup>  | bovine brain tubulin                                                                                                                                   | Muller-Reichert 1998   |
| 22.3 | 6    | Cryo 2D                | GDP, 40 mM Ca <sup>2+</sup> | bovine brain tubulin                                                                                                                                   | Muller-Reichert 1998   |
| 12.2 | 2.8  | Cryo 2D                | GmpCp, Ca <sup>2+</sup>     | bovine brain tubulin                                                                                                                                   | Muller-Reichert 1998   |

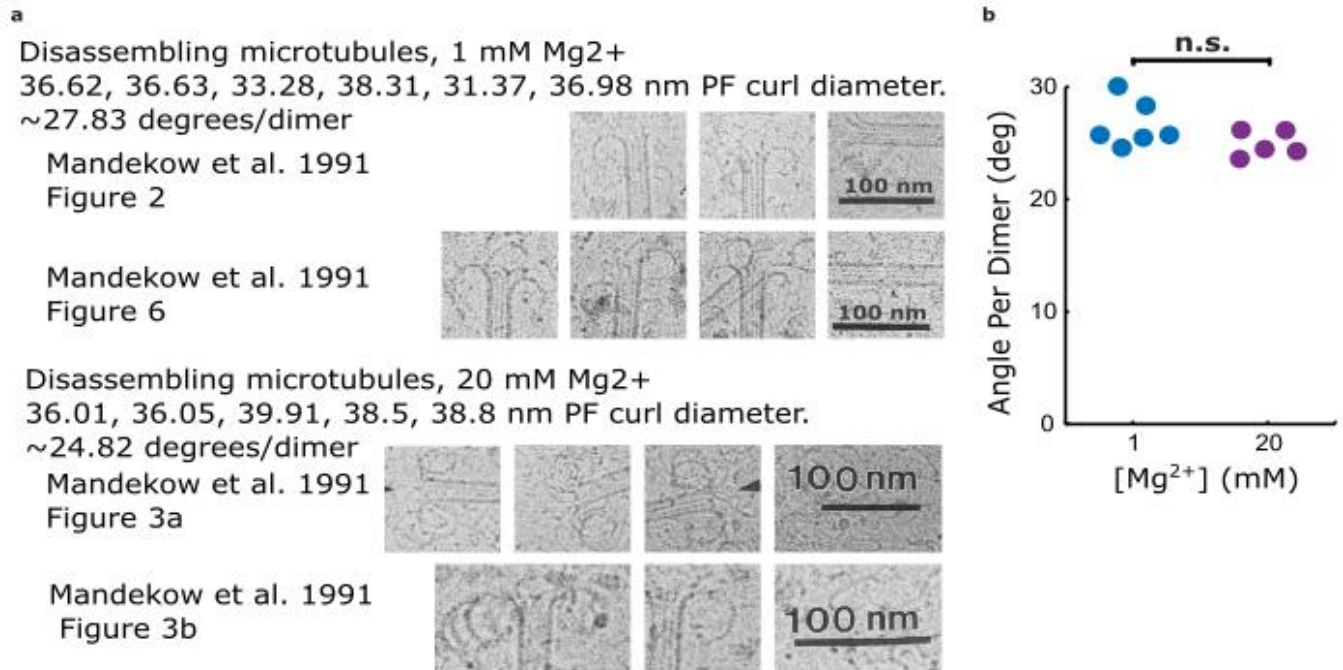

**Figure 4–figure supplement 3. Estimates of protofilament curvature from micrographs of disassembling microtubule tips presented in Mandelkow et al. 1991. (a) Cropped 2D cryo-EM micrographs from Mandelkow et al. 1991 showing curling protofilaments used to estimate curvature for various levels of magnesium. (b) Plot relating quantifications of curvatures from images shown in (a), estimated by measuring the diameter of the curl. Curvature per dimer is plotted for two different magnesium concentrations.**

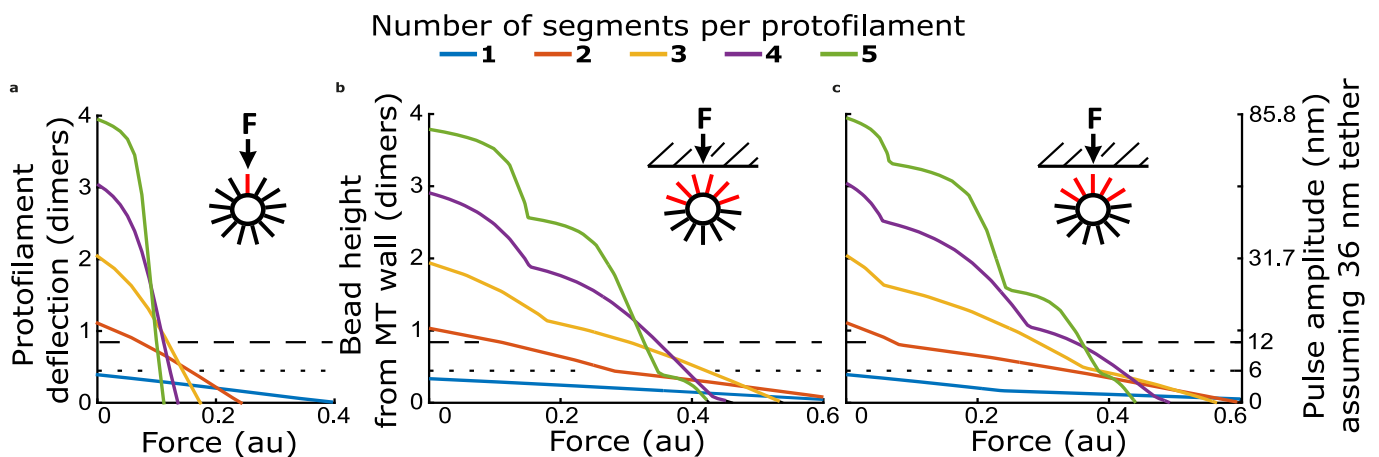

**Figure 4–figure supplement 4. Comparison of force-deflection relationship for a single protofilament, and multiple protofilaments arranged to reflect geometry at a microtubule tip. (a) Protofilament tip deflection versus force for a single protofilament, with 1 to 5 segments. (b) Bead height versus force for a multi-protofilament model with protofilaments arranged in a 13-protofilament configuration, oriented such that two protofilaments contact the bead simultaneously. (c) Bead height versus force for a multi-protofilament model with the same arrangement of protofilaments as in (b) but rotated such that a single protofilament establishes bead contact first.**

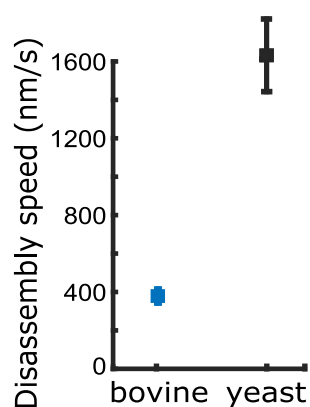

**Figure 4—figure supplement 5. Comparison of disassembly speeds for bovine versus yeast microtubules.** Yeast tubulin disassembles 4-fold faster than bovine tubulin in the presence of 1 mM magnesium. Points are means. Error bars represent 95% confidence interval for the mean (Student's  $t$ ).

**Figure 2—source data 1: Individual pulse amplitudes and disassembly speeds measured using bovine microtubules across different magnesium levels.** These source data are provided in an excel spreadsheet.

**Figure 3—source data 1: Individual pulse amplitudes measured using bovine microtubules across different trapping forces and magnesium levels.** These source data are provided in an excel spreadsheet.

**Figure 4—source data 1: Individual pulse amplitudes measured using yeast and bovine microtubules across different trapping forces and magnesium levels.** These source data are provided in an excel spreadsheet.

**Figure 5—source data 1: Uncropped image of Coomassie-stained gel showing subtilisin-treated bovine tubulin.** This image is provided as a JPG file with relevant lanes labeled.

**Figure 5—source data 2: Uncropped image of anti-alpha-tubulin Western blot of subtilisin-treated bovine tubulin.** This image is provided as a JPG file with relevant lanes labeled.

**Figure 5—source data 3: Uncropped image of anti-beta-tubulin Western blot of subtilisin-treated bovine tubulin.** This image is provided as a JPG file with relevant lanes labeled.

**Figure 5—source data 4: Individual pulse amplitudes and disassembly speeds measured using microtubules assembled with subtilisin-treated bovine tubulin.** These source data are provided in an excel spreadsheet.

**Figure 5—source data 5: Full raw unedited image of Coomassie-stained gel showing subtilisin-treated bovine tubulin.** This full raw unedited image is provided as a PNG file.

**Figure 5—source data 6: Full raw unedited image of anti-alpha-tubulin Western blot of subtilisin-treated bovine tubulin.** This full raw unedited image is provided as a TIF file.

**Figure 5—source data 7: Full raw unedited image of anti-alpha-tubulin Western blot of subtilisin-treated bovine tubulin.** This full raw unedited image is provided as a TIF file.



## References:

- Amos, L. A., & Klug, A. (1974). ARRANGEMENT OF SUBUNITS IN FLAGELLAR MICROTUBULES. *Journal of Cell Science*, *14*(3), 523-549.
- Caplow, M., Ruhlen, R. L., & Shanks, J. (1994). THE FREE-ENERGY FOR HYDROLYSIS OF A MICROTUBULE-BOUND NUCLEOTIDE TRIPHOSPHATE IS NEAR ZERO - ALL OF THE FREE-ENERGY FOR HYDROLYSIS IS STORED IN THE MICROTUBULE LATTICE. *Journal of Cell Biology*, *127*(3), 779-788. doi:10.1083/jcb.127.3.779
- Carminati, J. L., & Stearns, T. (1997). Microtubules orient the mitotic spindle in yeast through dynein-dependent interactions with the cell cortex. *Journal of Cell Biology*, *138*(3), 629-641. doi:10.1083/jcb.138.3.629
- Cassimeris, L., Gard, D., Tran, P. T., & Erickson, H. P. (2001). XMAP215 is a long thin molecule that does not increase microtubule stiffness. *Journal of Cell Science*, *114*(16), 3025-3033.
- Castoldi, M., & Popov, A. V. (2003). Purification of brain tubulin through two cycles of polymerization-depolymerization in a high-molarity buffer. *Protein Expression and Purification*, *32*(1), 83-88. doi:10.1016/s1046-5928(03)00218-3
- Correia, J. J., Baty, L. T., & Williams, R. C. (1987). MG-2+ DEPENDENCE OF GUANINE-NUCLEOTIDE BINDING TO TUBULIN. *Journal of Biological Chemistry*, *262*(36), 17278-17284.
- Desai, A., & Mitchison, T. J. (1997). Microtubule polymerization dynamics. *Annual Review of Cell and Developmental Biology*, *13*, 83-117. doi:10.1146/annurev.cellbio.13.1.83
- Desai, A., Verma, S., Mitchison, T. J., & Walczak, C. E. (1999). Kin I kinesins are microtubule-destabilizing enzymes. *Cell*, *96*(1), 69-78. doi:10.1016/s0092-8674(00)80960-5
- Dogterom, M., Kerssemakers, J. W., Romet-Lemonne, G., & Janson, M. E. (2005). Force generation by dynamic microtubules. *Current Opinion in Cell Biology*, *17*(1), 67-74. doi:10.1016/j.ceb.2004.12.011
- Driver, J. W., Geyer, E. A., Bailey, M. E., Rice, L. M., & Asbury, C. L. (2017). Direct measurement of conformational strain energy in protofilaments curling outward from disassembling microtubule tips. *Elife*, *6*, 18. doi:10.7554/eLife.28433
- Farmer, V., Arpa, G., Hall, S. L., & Zanic, M. (2021). XMAP215 promotes microtubule catastrophe by disrupting the growing microtubule end. *Journal of Cell Biology*, *220*(10), 13. doi:10.1083/jcb.202012144
- Fees, C. P., & Moore, J. K. (2018). Regulation of microtubule dynamic instability by the carboxy-terminal tail of beta-tubulin. *Life Science Alliance*, *1*(2), 13. doi:10.26508/lsa.201800054
- Franck, A. D., Powers, A. F., Gestaut, D. R., Davis, T. N., & Asbury, C. L. (2010). Direct physical study of kinetochore-microtubule interactions by reconstitution and interrogation with an optical force clamp. *Methods*, *51*(2), 242-250. doi:10.1016/j.ymeth.2010.01.020
- Girao, H., Okada, N., Rodrigues, T. A., Silva, A. O., Figueiredo, A. C., Garcia, Z., . . . Maiato, H. (2020). CLASP2 binding to curved microtubule tips promotes flux and stabilizes kinetochore attachments. *Journal of Cell Biology*, *219*(2), 20. doi:10.1083/jcb.201905080
- Grishchuk, E. L., Molodtsov, M. I., Ataullakhanov, F. I., & McIntosh, J. R. (2005). Force production by disassembling microtubules. *Nature*, *438*(7066), 384-388. doi:10.1038/nature04132

- Gudimchuk, N. B., Ulyanov, E. V., O'Toole, E., Page, C. L., Vinogradov, D. S., Morgan, G., . . . Richard McIntosh, J. (2020). Mechanisms of microtubule dynamics and force generation examined with computational modeling and electron cryotomography. *Nature Communications*, *11*(1), 3765. doi:10.1038/s41467-020-17553-2
- Hawkins, T., Mirigian, M., Yasar, M. S., & Ross, J. L. (2010). Mechanics of microtubules. *Journal of Biomechanics*, *43*(1), 23-30. doi:10.1016/j.jbiomech.2009.09.005
- Hill, T. L. (1985). THEORETICAL PROBLEMS RELATED TO THE ATTACHMENT OF MICROTUBULES TO KINETOCHORES. *Proceedings of the National Academy of Sciences of the United States of America*, *82*(13), 4404-4408. doi:10.1073/pnas.82.13.4404
- Howard, J. (1996). The movement of kinesin along microtubules. *Annual Review of Physiology*, *58*, 703-729. doi:10.1146/annurev.physiol.58.1.703
- Howes, S. C., Geyer, E. A., LaFrance, B., Zhang, R., Kellogg, E. H., Westermann, S., . . . Nogales, E. (2018). Structural and functional differences between porcine brain and budding yeast microtubules. *Cell Cycle*, *17*(3), 278-287. doi:10.1080/15384101.2017.1415680
- Inoue, S., & Salmon, E. D. (1995). FORCE GENERATION BY MICROTUBULE ASSEMBLY DISASSEMBLY IN MITOSIS AND RELATED MOVEMENTS. *Molecular Biology of the Cell*, *6*(12), 1619-1640.
- Johnson, V., Ayaz, P., Huddleston, P., & Rice, L. M. (2011). Design, Overexpression, and Purification of Polymerization-Blocked Yeast alpha beta-Tubulin Mutants. *Biochemistry*, *50*(40), 8636-8644. doi:10.1021/bi2005174
- Kerssemakers, J. W. J., Munteanu, E. L., Laan, L., Noetzel, T. L., Janson, M. E., & Dogterom, M. (2006). Assembly dynamics of microtubules at molecular resolution. *Nature*, *442*(7103), 709-712. doi:10.1038/nature04928
- Kirschner, M. W., Williams, R. C., Weingarten, M., & Gerhart, J. C. (1974). MICROTUBULES FROM MAMMALIAN BRAIN - SOME PROPERTIES OF THEIR DEPOLYMERIZATION PRODUCTS AND A PROPOSED MECHANISM OF ASSEMBLY AND DISASSEMBLY. *Proceedings of the National Academy of Sciences of the United States of America*, *71*(4), 1159-1163. doi:10.1073/pnas.71.4.1159
- Kononova, O., Kholodov, Y., Theisen, K. E., Marx, K. A., Dima, R. I., Ataulakhanov, F. I., . . . Barsegov, V. (2014). Tubulin Bond Energies and Microtubule Biomechanics Determined from Nanoindentation in Silico. *Journal of the American Chemical Society*, *136*(49), 17036-17045. doi:10.1021/ja506385p
- Koshland, D. E., Mitchison, T. J., & Kirschner, M. W. (1988). POLEWARDS CHROMOSOME MOVEMENT DRIVEN BY MICROTUBULE DEPOLYMERIZATION INVITRO. *Nature*, *331*(6156), 499-504. doi:10.1038/331499a0
- Kozlowski, C., Srayko, M., & Nedelec, F. (2007). Cortical microtubule contacts position the spindle in *C. elegans* embryos. *Cell*, *129*(3), 499-510. doi:10.1016/j.cell.2007.03.027
- Lee, J. C., & Timasheff, S. N. (1975). RECONSTITUTION OF MICROTUBULES FROM PURIFIED CALF BRAIN TUBULIN. *Biochemistry*, *14*(23), 5183-5187. doi:10.1021/bi00694a025
- Mandelkow, E. M., & Mandelkow, E. (1985). UNSTAINED MICROTUBULES STUDIES BY CRYO-ELECTRON MICROSCOPY - SUBSTRUCTURE, SUPERTWIST AND DISASSEMBLY. *Journal of molecular biology*, *181*(1), 123-135. doi:10.1016/0022-2836(85)90330-4
- Mandelkow, E. M., Mandelkow, E., & Milligan, R. A. (1991). MICROTUBULE DYNAMICS AND MICROTUBULE CAPS - A TIME-RESOLVED CRYOELECTRON MICROSCOPY STUDY. *Journal of Cell Biology*, *114*(5), 977-991. doi:10.1083/jcb.114.5.977
- Martin, S. R., Butler, F. M. M., Clark, D. C., Zhou, J. M., & Bayley, P. M. (1987). MAGNESIUM-ION EFFECTS ON MICROTUBULE NUCLEATION INVITRO. *Biochimica Et Biophysica Acta*, *914*(1), 96-100. doi:10.1016/0167-4838(87)90166-x

- McIntosh, J. R., O'Toole, E., Morgan, G., Austin, J., Ulyanov, E., Ataulakhanov, F., & Gudimchuk, N. (2018). Microtubules grow by the addition of bent guanosine triphosphate tubulin to the tips of curved protofilaments. *Journal of Cell Biology*, *217*(8), 2691-2708. doi:10.1083/jcb.201802138
- McIntosh, J. R., Volkov, V., Ataulakhanov, F. I., & Grishchuk, E. L. (2010). Tubulin depolymerization may be an ancient biological motor. *Journal of Cell Science*, *123*(20), 3425-3434. doi:10.1242/jcs.067611
- Meijering, E., Dzyubachyk, O., & Smal, I. (2012). METHODS FOR CELL AND PARTICLE TRACKING. In P. M. Conn (Ed.), *Imaging and Spectroscopic Analysis of Living Cells: Optical and Spectroscopic Techniques* (Vol. 504, pp. 183-200). San Diego: Elsevier Academic Press Inc.
- Mejillano, M. R., & Himes, R. H. (1991). BINDING OF GUANINE-NUCLEOTIDES AND MG<sup>2+</sup> TO TUBULIN WITH A NUCLEOTIDE-DEPLETED EXCHANGEABLE SITE. *Archives of Biochemistry and Biophysics*, *291*(2), 356-362. doi:10.1016/0003-9861(91)90146-a
- Miranda, J. J. L., De Wulf, P., Sorger, P. K., & Harrison, S. C. (2005). The yeast DASH complex forms closed rings on microtubules. *Nature Structural & Molecular Biology*, *12*(2), 138-143. doi:10.1038/nsmb896
- Molodtsov, M. I., Grishchuk, E. L., Efremov, A. K., McIntosh, J. R., & Ataulakhanov, F. I. (2005). Force production by depolymerizing microtubules: A theoretical study. *Proceedings of the National Academy of Sciences of the United States of America*, *102*(12), 4353-4358. doi:10.1073/pnas.0501142102
- Muller-Reichert, T., Chretien, D., Severin, F., & Hyman, A. A. (1998). Structural changes at microtubule ends accompanying GTP hydrolysis: Information from a slowly hydrolyzable analogue of GTP, guanylyl (alpha,beta)methylenediphosphonate. *Proceedings of the National Academy of Sciences of the United States of America*, *95*(7), 3661-3666. doi:10.1073/pnas.95.7.3661
- Murray, L. E., Kim, H., Rice, L. M., & Asbury, C. L. (2022). Catching the conformational wave: measuring the working strokes of protofilaments as they curl outwards from disassembling microtubule tips. *Methods in molecular biology (Clifton, NJ.)*, *2478*.
- Nguyen-Ngoc, T., Afshar, K., & Gonczy, P. (2007). Coupling of cortical dynein and G alpha proteins mediates spindle positioning in *Caenorhabditis elegans*. *Nature Cell Biology*, *9*(11), 1294-U1158. doi:10.1038/ncb1649
- Nogales, E., Medrano, F. J., Diakun, G. P., Mant, G. R., Townsandrews, E., & Bordas, J. (1995). THE EFFECT OF TEMPERATURE ON THE STRUCTURE OF VINBLASTINE-INDUCED POLYMERS OF PURIFIED TUBULIN - DETECTION OF A REVERSIBLE CONFORMATIONAL CHANGE. *Journal of molecular biology*, *254*(3), 416-430. doi:10.1006/jmbi.1995.0628
- O'Brien, E. T., Salmon, E. D., Walker, R. A., & Erickson, H. P. (1990). EFFECTS OF MAGNESIUM ON THE DYNAMIC INSTABILITY OF INDIVIDUAL MICROTUBULES. *Biochemistry*, *29*(28), 6648-6656. doi:10.1021/bi00480a014
- Olmsted, J. B., & Borisy, G. G. (1975). IONIC AND NUCLEOTIDE REQUIREMENTS FOR MICROTUBULE POLYMERIZATION INVITRO. *Biochemistry*, *14*(13), 2996-3005. doi:10.1021/bi00684a032
- Powell, M. J. D. (1970). A New Algorithm for Unconstrained Optimization. In J. B. Rosen, O. L. Mangasarian, & K. Ritter (Eds.), *Nonlinear Programming* (pp. 31-65): Academic Press.
- Powers, A. F., Franck, A. D., Gestaut, D. R., Cooper, J., Gracyzk, B., Wei, R. R., . . . Asbury, C. L. (2009). The Ndc80 Kinetochore Complex Forms Load-Bearing Attachments to Dynamic Microtubule Tips via Biased Diffusion. *Cell*, *136*(5), 865-875. doi:10.1016/j.cell.2008.12.045

- Rosenfeld, A. C., Zackroff, R. V., & Weisenberg, R. C. (1976). MAGNESIUM STIMULATION OF CALCIUM-BINDING TO TUBULIN AND CALCIUM INDUCED DEPOLYMERIZATION OF MICROTUBULES. *Febs Letters*, *65*(2), 144-147. doi:10.1016/0014-5793(76)80466-8
- Sackett, D. L., Bhattacharyya, B., & Wolff, J. (1985). TUBULIN SUBUNIT CARBOXYL TERMINI DETERMINE POLYMERIZATION EFFICIENCY. *Journal of Biological Chemistry*, *260*(1), 43-45.
- Serrano, L., Avila, J., & Maccioni, R. B. (1984). CONTROLLED PROTEOLYSIS OF TUBULIN BY SUBTILISIN - LOCALIZATION OF THE SITE FOR MAP2 INTERACTION. *Biochemistry*, *23*(20), 4675-4681. doi:10.1021/bi00315a024
- Serrano, L., Delatorre, J., Maccioni, R. B., & Avila, J. (1984). INVOLVEMENT OF THE CARBOXYL-TERMINAL DOMAIN OF TUBULIN IN THE REGULATION OF ITS ASSEMBLY. *Proceedings of the National Academy of Sciences of the United States of America - Biological Sciences*, *81*(19), 5989-5993. doi:10.1073/pnas.81.19.5989
- Tran, P. T., Joshi, P., & Salmon, E. D. (1997). How tubulin subunits are lost from the shortening ends of microtubules. *Journal of Structural Biology*, *118*(2), 107-118. doi:10.1006/jsbi.1997.3844
- Umbreit, N. T., Miller, M. P., Tien, J. F., Ortola, J. C., Gui, L., Lee, K. K., . . . Davis, T. N. (2014). Kinetochores require oligomerization of Dam1 complex to maintain microtubule attachments against tension and promote biorientation. *Nature Communications*, *5*, 11. doi:10.1038/ncomms5951
- VanBuren, V., Cassimeris, L., & Odde, D. J. (2005). Mechanochemical model of microtubule structure and self-assembly kinetics. *Biophysical Journal*, *89*(5), 2911-2926. doi:10.1529/biophysj.105.060913
- VanBuren, V., Odde, D. J., & Cassimeris, L. (2002). Estimates of lateral and longitudinal bond energies within the microtubule lattice. *Proceedings of the National Academy of Sciences of the United States of America*, *99*(9), 6035-6040. doi:10.1073/pnas.092504999
- Walker, R. A., O'Brien, E. T., Pryer, N. K., Soboeiro, M. F., Voter, W. A., Erickson, H. P., & Salmon, E. D. (1988). DYNAMIC INSTABILITY OF INDIVIDUAL MICROTUBULES ANALYZED BY VIDEO LIGHT-MICROSCOPY - RATE CONSTANTS AND TRANSITION FREQUENCIES. *Journal of Cell Biology*, *107*(4), 1437-1448. doi:10.1083/jcb.107.4.1437
- Weisenberg, R. C. (1972). MICROTUBULE FORMATION IN-VITRO IN SOLUTIONS CONTAINING LOW CALCIUM CONCENTRATIONS. *Science*, *177*(4054), 1104-+. doi:10.1126/science.177.4054.1104
- Westermann, S., Avila-Sakar, A., Wang, H. W., Niederstrasser, H., Wong, J., Drubin, D. G., . . . Barnes, G. (2005). Formation of a dynamic kinetochore-microtubule interface through assembly of the Dam1 ring complex. *Molecular Cell*, *17*(2), 277-290. doi:10.1016/j.molcel.2004.12.019
- Westermann, S., Wang, H. W., Avila-Sakar, A., Drubin, D. G., Nogales, E., & Barnes, G. (2006). The Dam1 kinetochore ring complex moves processively on depolymerizing microtubule ends. *Nature*, *440*(7083), 565-569. doi:10.1038/nature04409
- Winey, M., Mamay, C. L., Otoole, E. T., Mastronarde, D. N., Giddings, T. H., McDonald, K. L., & McIntosh, J. R. (1995). 3-DIMENSIONAL ULTRASTRUCTURAL ANALYSIS OF THE SACCHAROMYCES-CEREVISIAE MITOTIC SPINDLE. *Journal of Cell Biology*, *129*(6), 1601-1615. doi:10.1083/jcb.129.6.1601
